# Supplementary material for: Chromosome-level genome assembly of a regenerable maize inbred line A188
Source: Genome Biol. 2021 Jun 9;22:175. doi: 10.1186/s13059-021-02396-x (PMC8188678; doi:10.1186/s13059-021-02396-x)
Supplement: Supplementary file 1 — Additional file 1. Supplementary Figures S1-S32. [file 13059_2021_2396_MOESM1_ESM.pdf]

## Supplementary Data

### Chromosome-level Genome Assembly of a Regenerable Maize Inbred Line A188

Lin et al.

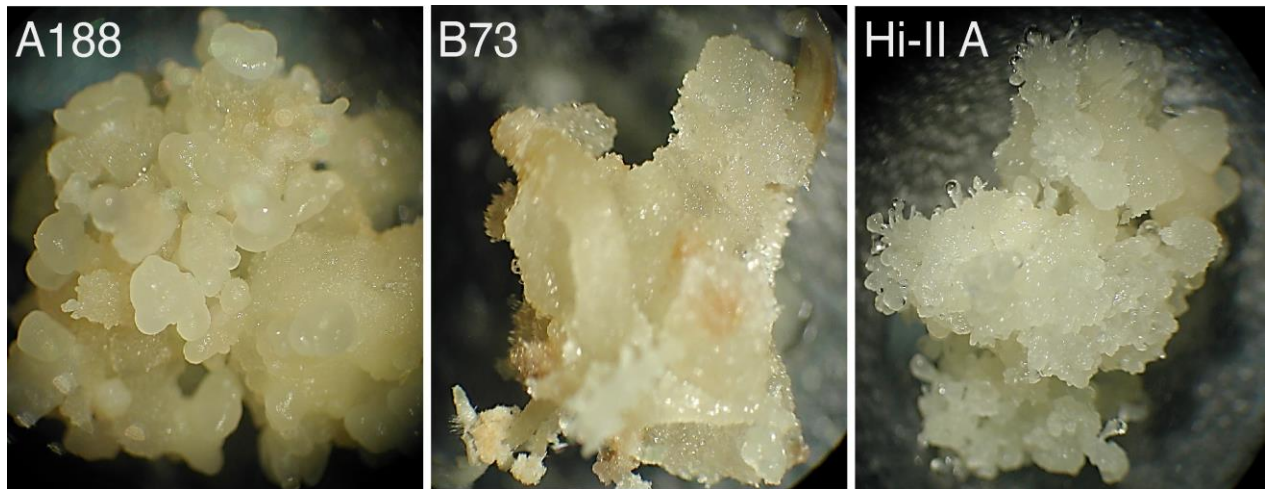

**Figure S1. Calli from immature embryos of A188, B73, and Hi-II A.** a, b, c) White, compact, and nodulated somatic embryos and embryogenic callus from A188, brownish, loose and non-embryogenic callus from B73, and white, friable and embryogenic callus from Hi-II A after 28 days of culture in callus induction media.

a

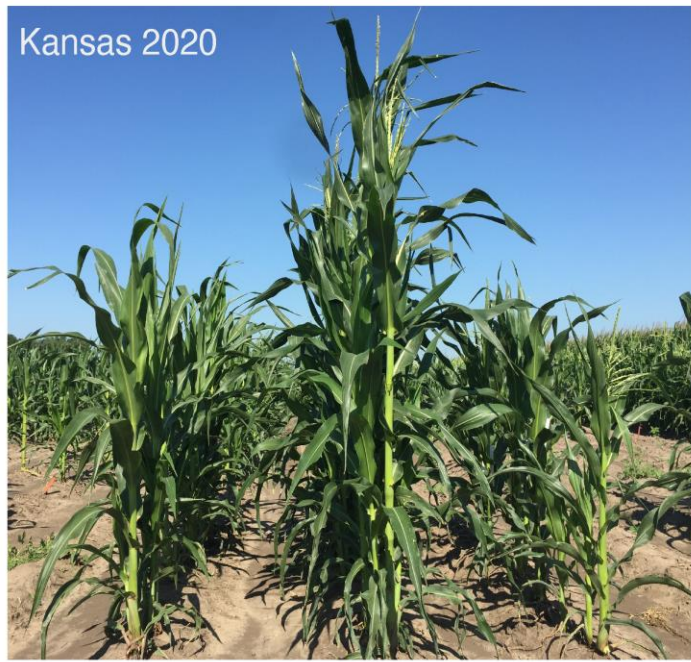

B73

B73xA188

A188

b

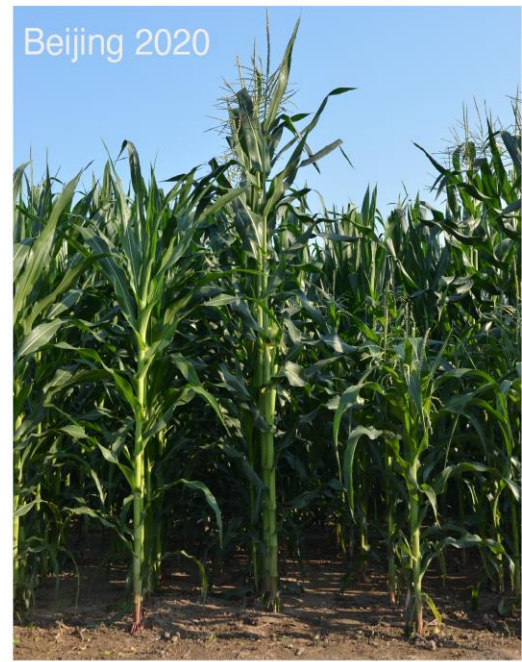

B73

B73xA188

A188

**Figure S2. Phenotypes of B73, F1, and A188. a,b).** Plants from 2020 summer nursery in Kansas (a) and Beijing (b).

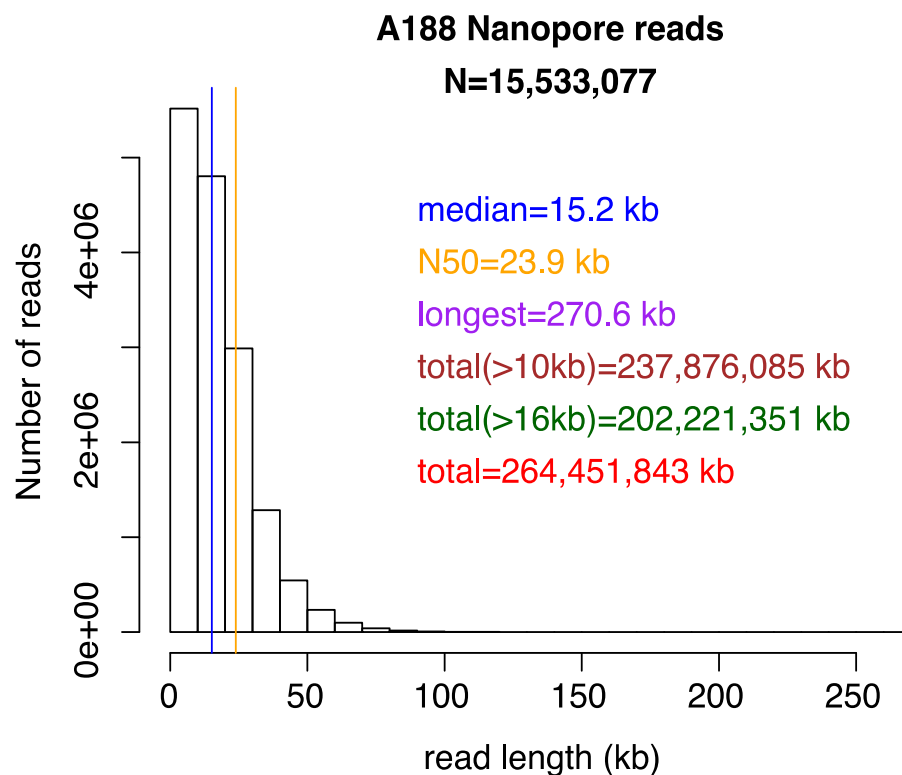

**Figure S3. Histogram of lengths of Nanopore raw reads.** MinION flowcells (N=31) were used to produce Nanopore reads for the A188 genome assembly, producing >264 Gb total sequences. The median and N50 of read lengths are indicated by blue and red vertical lines, respectively.

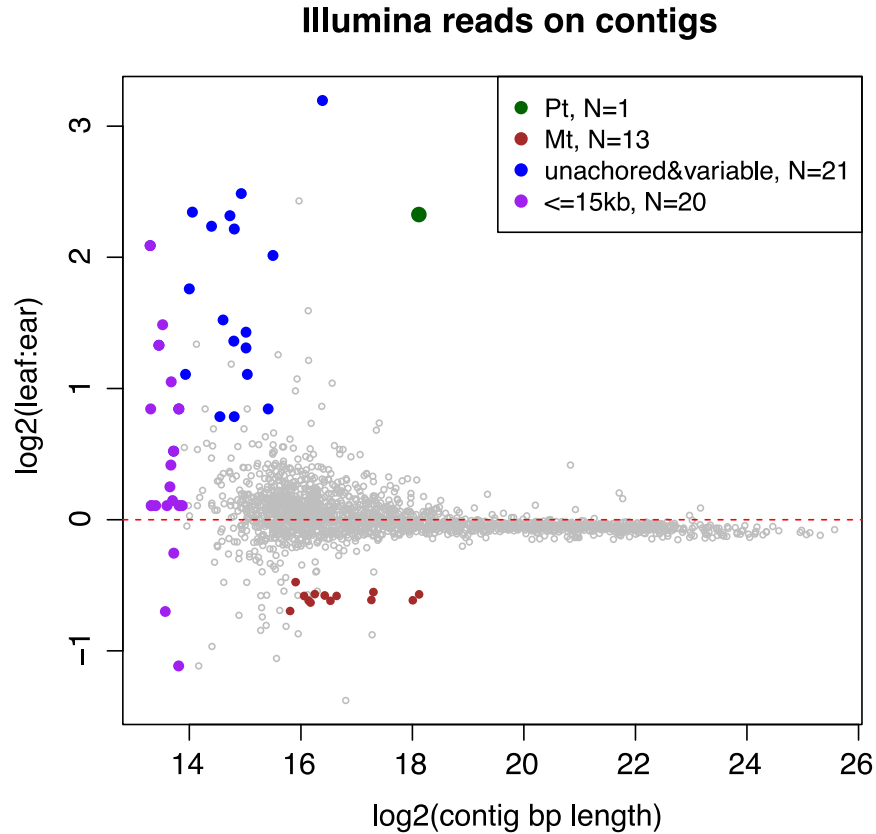

**Figure S4. Contig filtering based on read depths.** Log2 values of Illumina read depth ratios of seedling leaf to ear samples,  $\log_2(\text{leaf:ear})$ , were determined for each contig. Contigs that were not anchored to B73Ref4 and showed a high variability from 0 of  $\log_2(\text{leaf:ear})$  and contigs less than 15 kb were discarded. The chloroplast contig (pt) and mitochondrial contigs (mt) were replaced by the A188 chloroplast complete sequence (Genbank accession KF241980.1) and the A188 mitochondrion complete sequence (Genbank accession DQ490952.1), respectively.

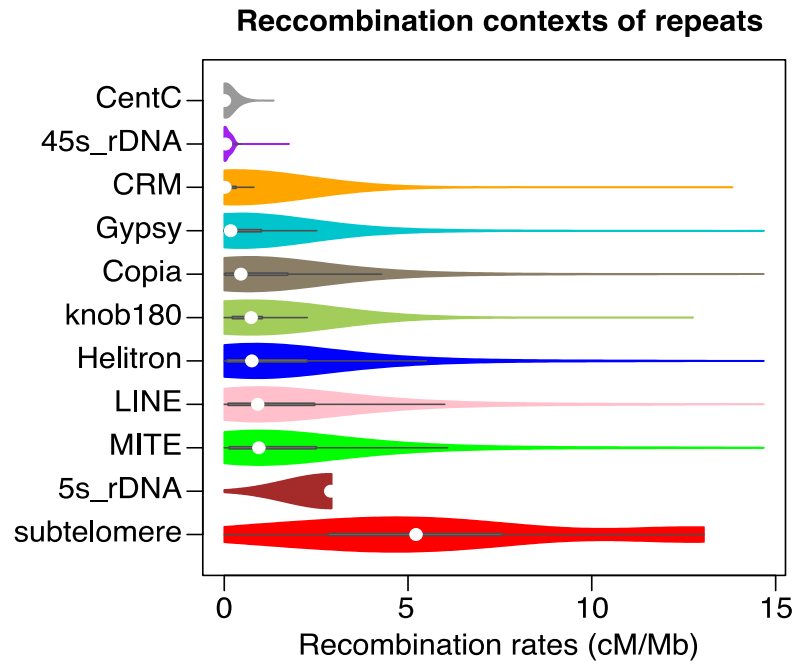

**Figure S5. Recombination of contexts around repeats.** For each repeat type, the recombination rate (cM/Mb) of the surrounding 1 Mb context was estimated for each sequence on chromosomes. A violin plot of all sequences of each type was plotted with a dot to represent the median.

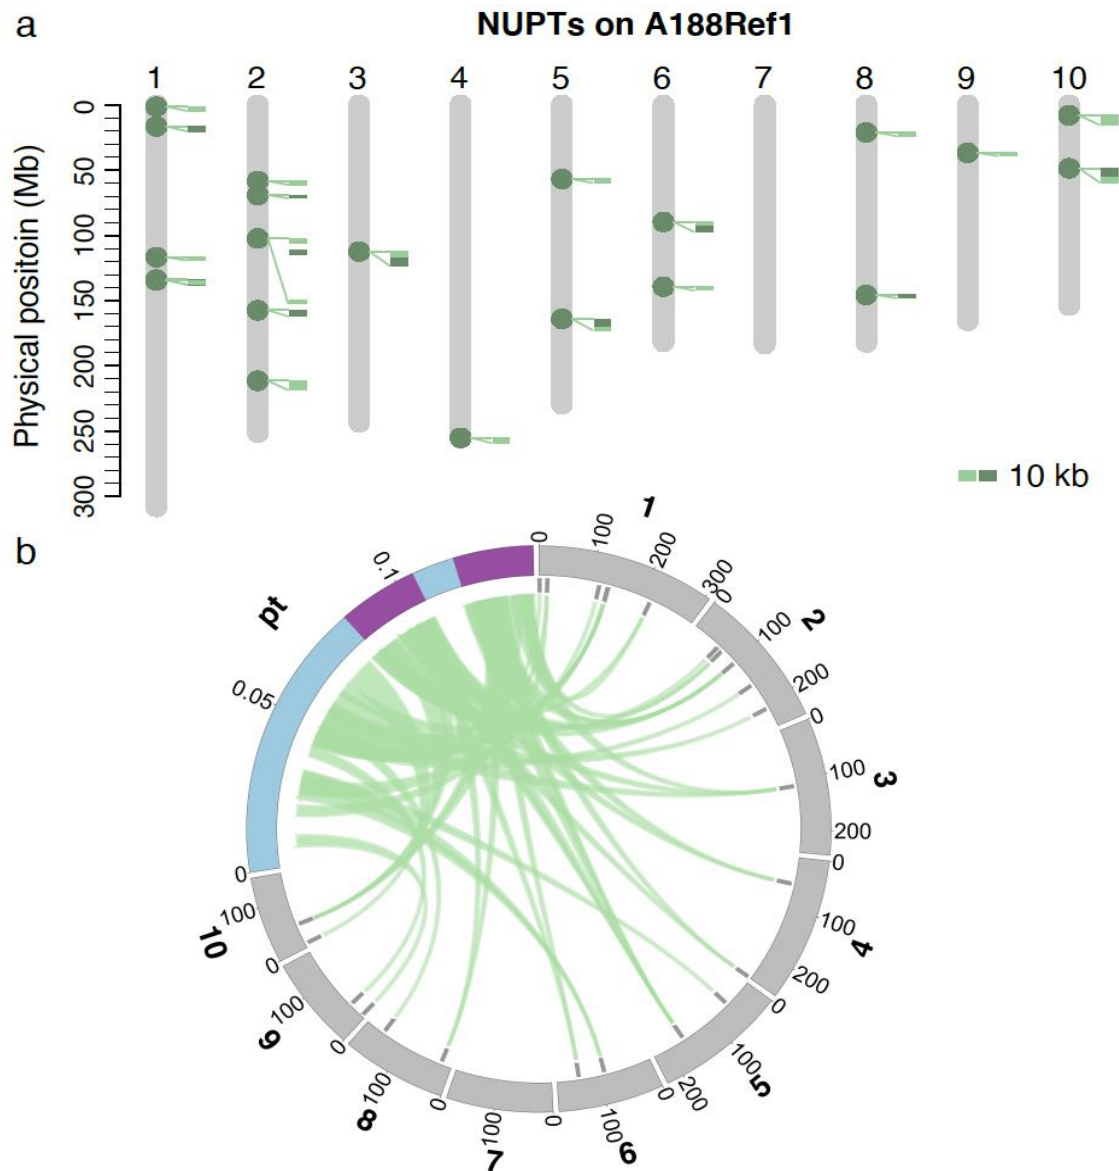

**Figure S6. Nuclear integration of chloroplast DNA.** **a).** NUP-T sequence on 10 chromosomes of A188Ref1. Each dot on chromosomes designates a potential NUP-T integration. Close-up alignments with the chloroplast genome are shown along NUP-Ts. Each alignment requires at least 3 kb match and 95% identity. **b).** Circos plot of alignments between the chloroplast (pt) genome and ten chromosomes. Purple highlights the large duplicated regions on pt. Gray bars locate NUP-T positions. Note that the chromosomal scale is different from the pt scale. Numbers on the track are in Mb.

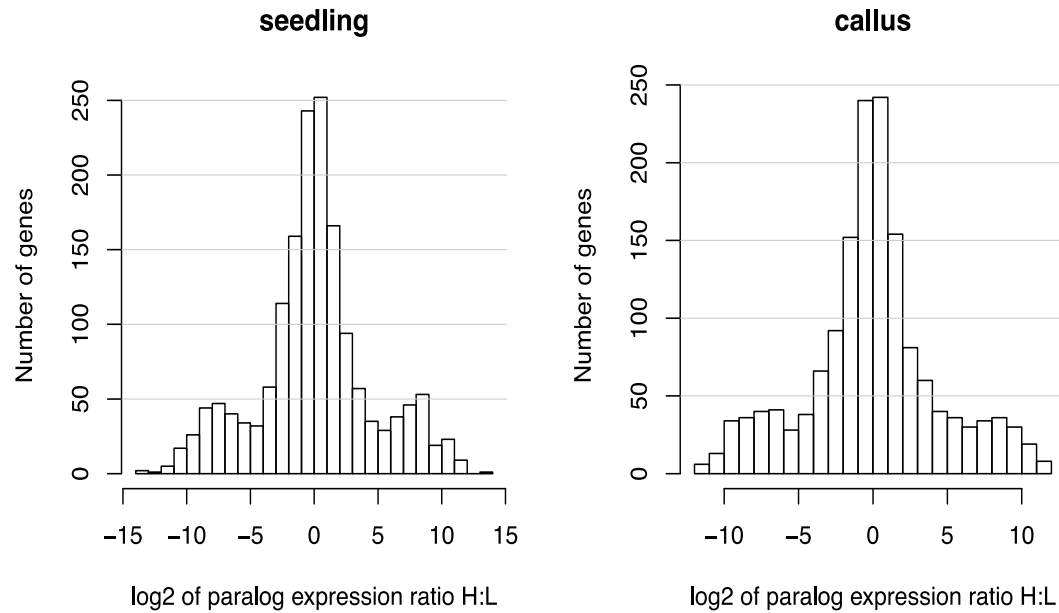

**Figure S7. Expression comparison of paralogs in high- and low-recombination regions.** Pairs of paralogs of which one is located at a high-recombination region (H) and the other is located at a low-recombination region (L) were compared for their expression. Histograms of the log<sub>2</sub> values of read counts ratio of H to L were plotted. Relatively symmetric distributions between positive and negative log<sub>2</sub> values indicated that the genomic context of the gene location was not a major driver for gene expression.

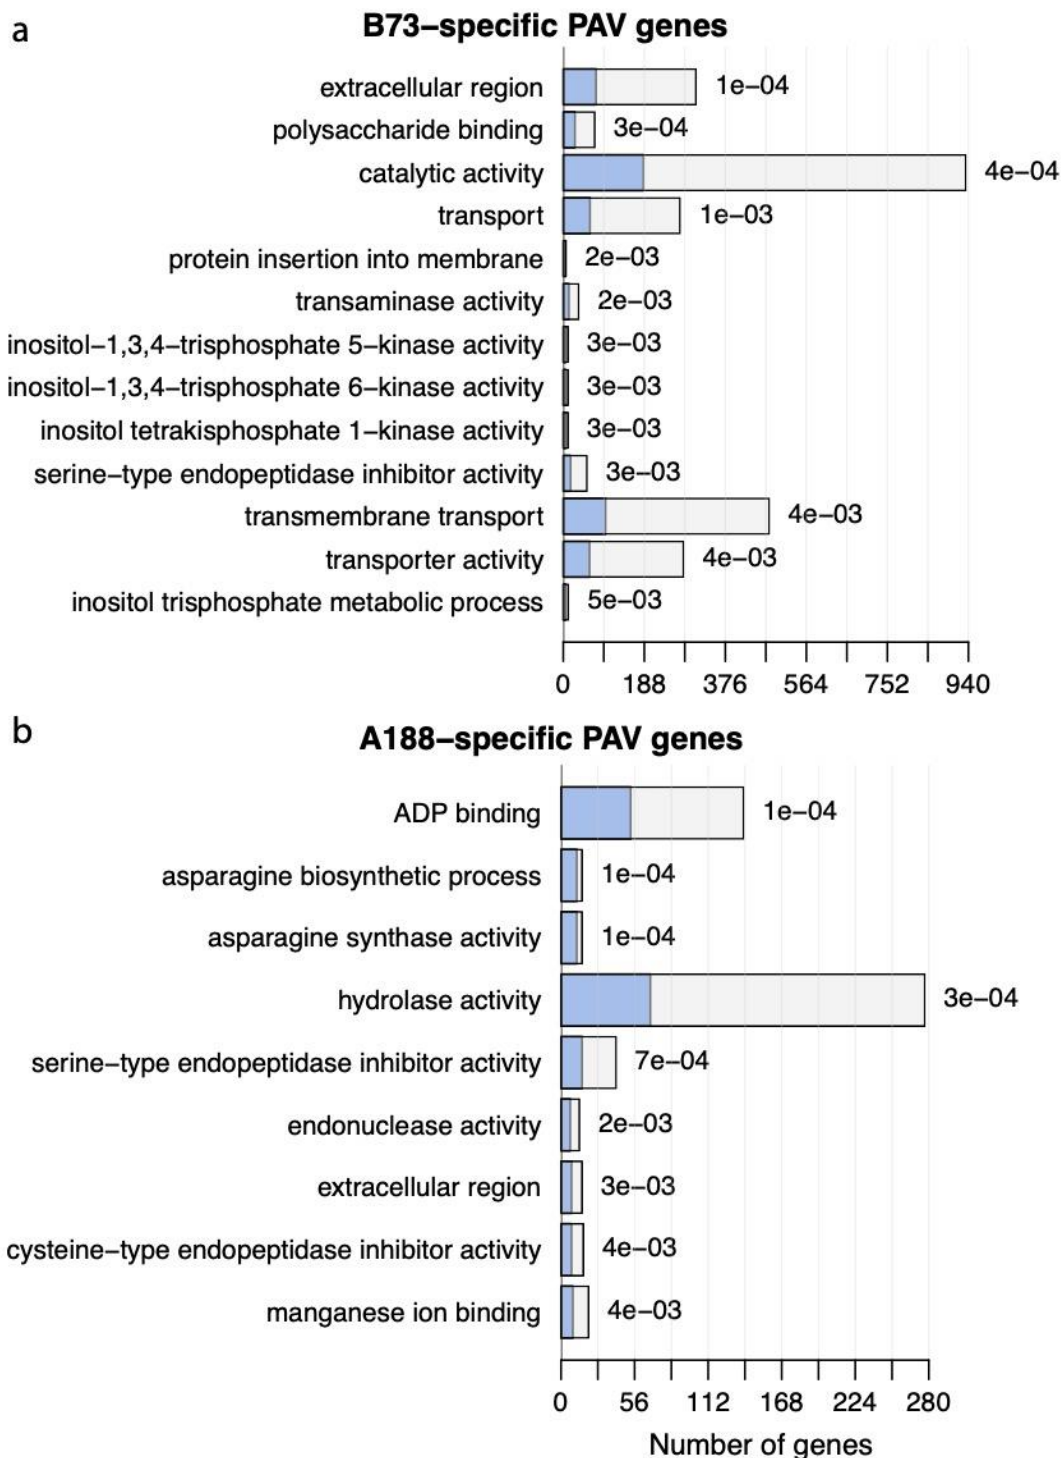

**Figure S8. GO enrichments of PAV/HDS genes.** Enriched GO terms in B73-specific PAV/HDS genes (**a**) and in A188-specific PAV/HDS genes (**b**). In each barplot, a blue bar stands for the number genes in the PAV/HDS gene set and the whole bar (blue and empty) stands for the total number of genes of the associated GO term. P-values are labeled on the top of each bar. Only the GO terms with the p-value smaller than 0.005 and containing at least five PAV genes were plotted.

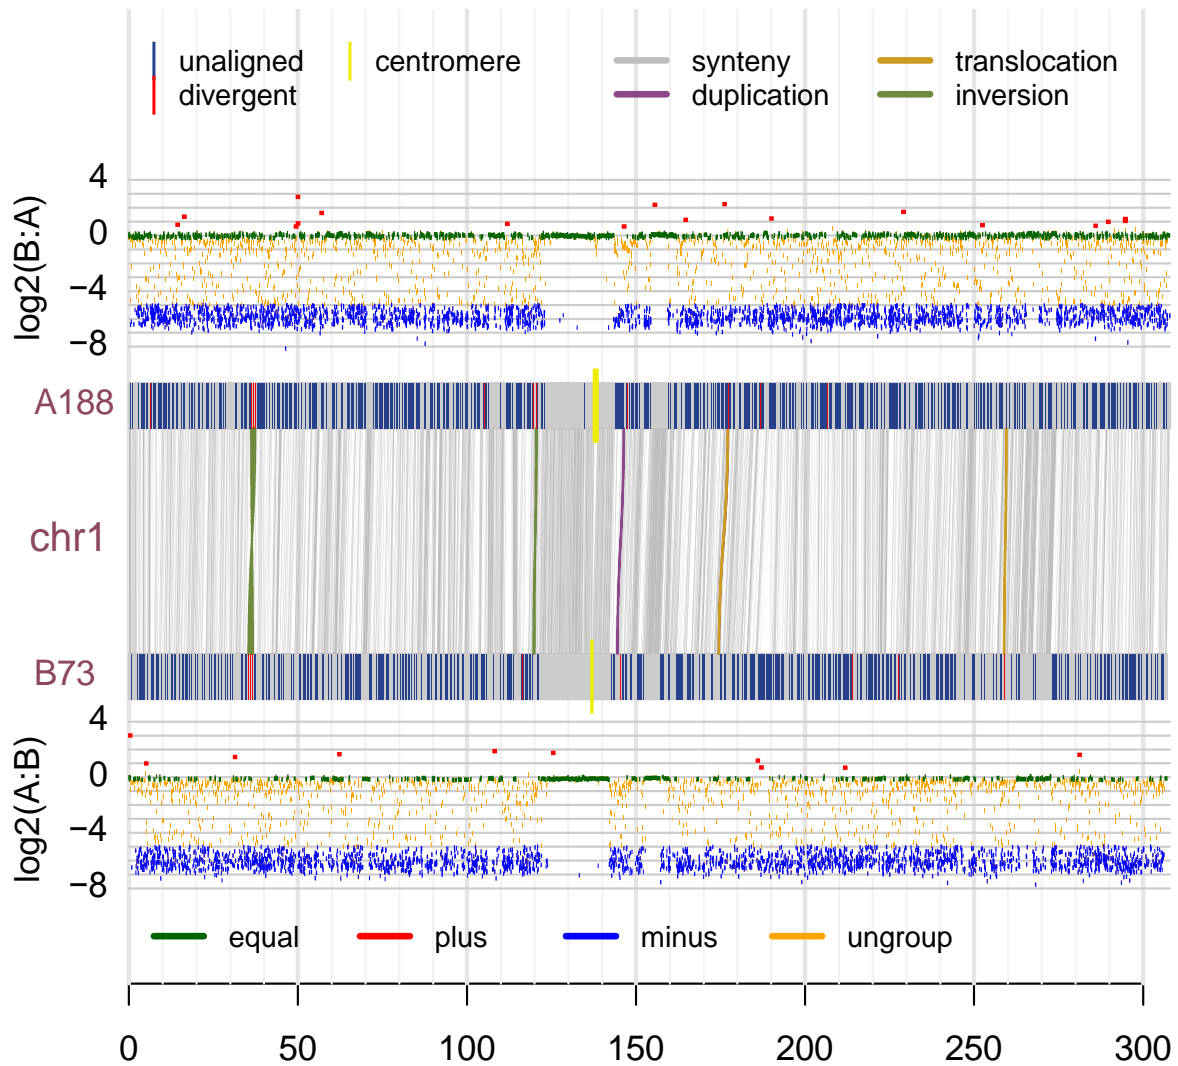

**Figure S9. SyRI and CGRD results on chromosome 1.** CGRD results using A188Ref1 and B73Ref4 as the reference genomes were plotted on the top and bottom, respectively. Y-axis represents  $\log_2$  values of ratios of read depths of B73 to A188,  $\log_2(B:A)$ , or  $\log_2$  values of ratios of read depths of A188 to B73,  $\log_2(A:B)$ , signifying copy number variation (CNV). The SyRI result is displayed in between two CGRD results. Alignments of syntenic blocks larger than 10 kb and alignments of other rearrangements larger than 0.5 Mb are plotted. On each A188 and B73 chromosome, segments not aligned to the other genome (unaligned), segments divergent with the other genome in a high degree (divergent), and centromeres are highlighted. The same plotting strategy was applied to chromosome 2, 3, 5, 6, 7, 8, 9, and 10.

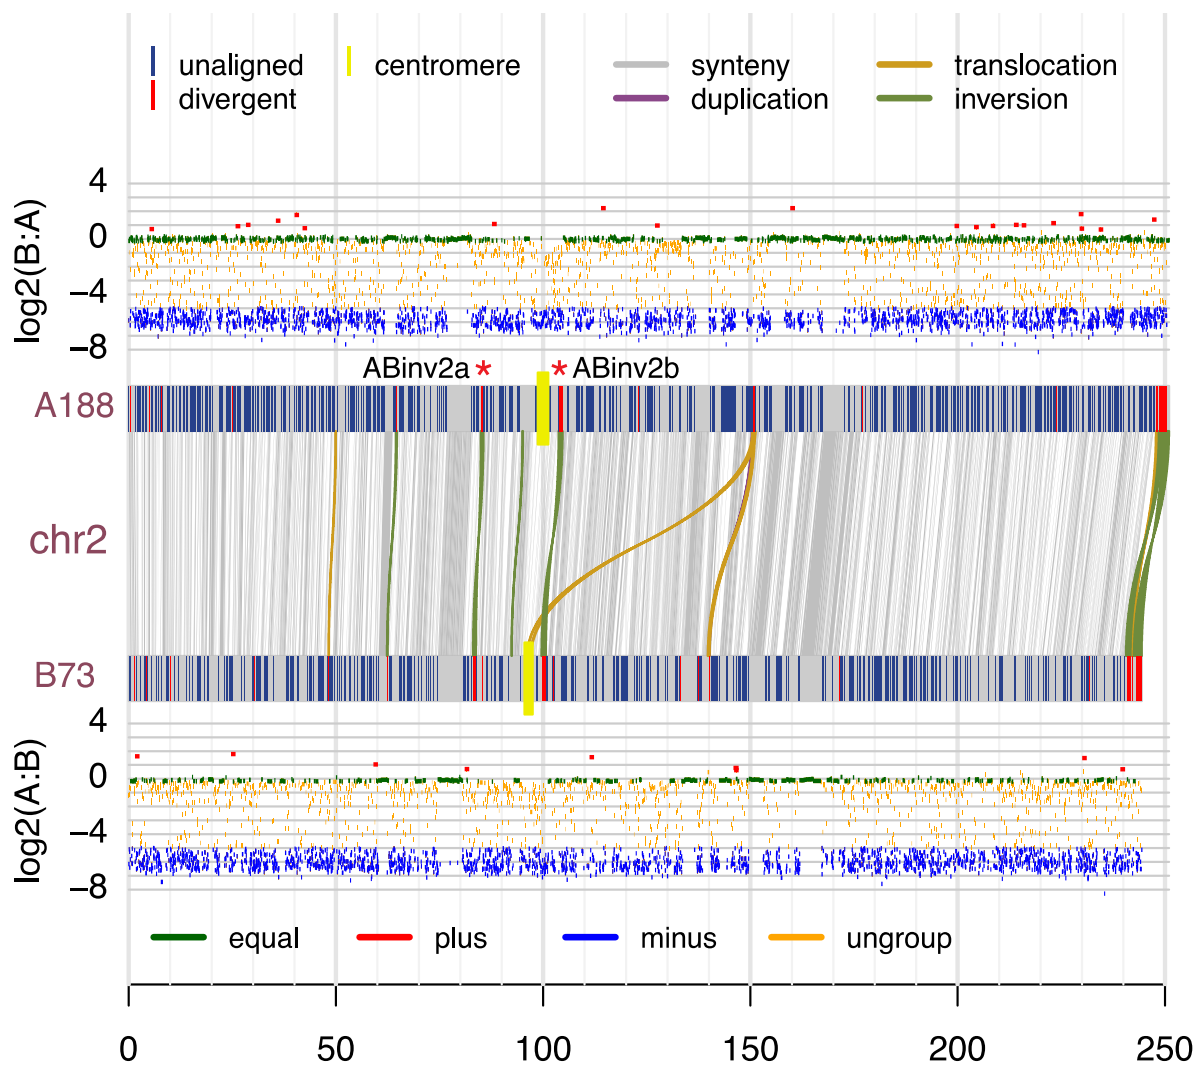

**Figure S10. SyRI and CGRD results on chromosome 2.** The red \* labels well-evidenced inversions.

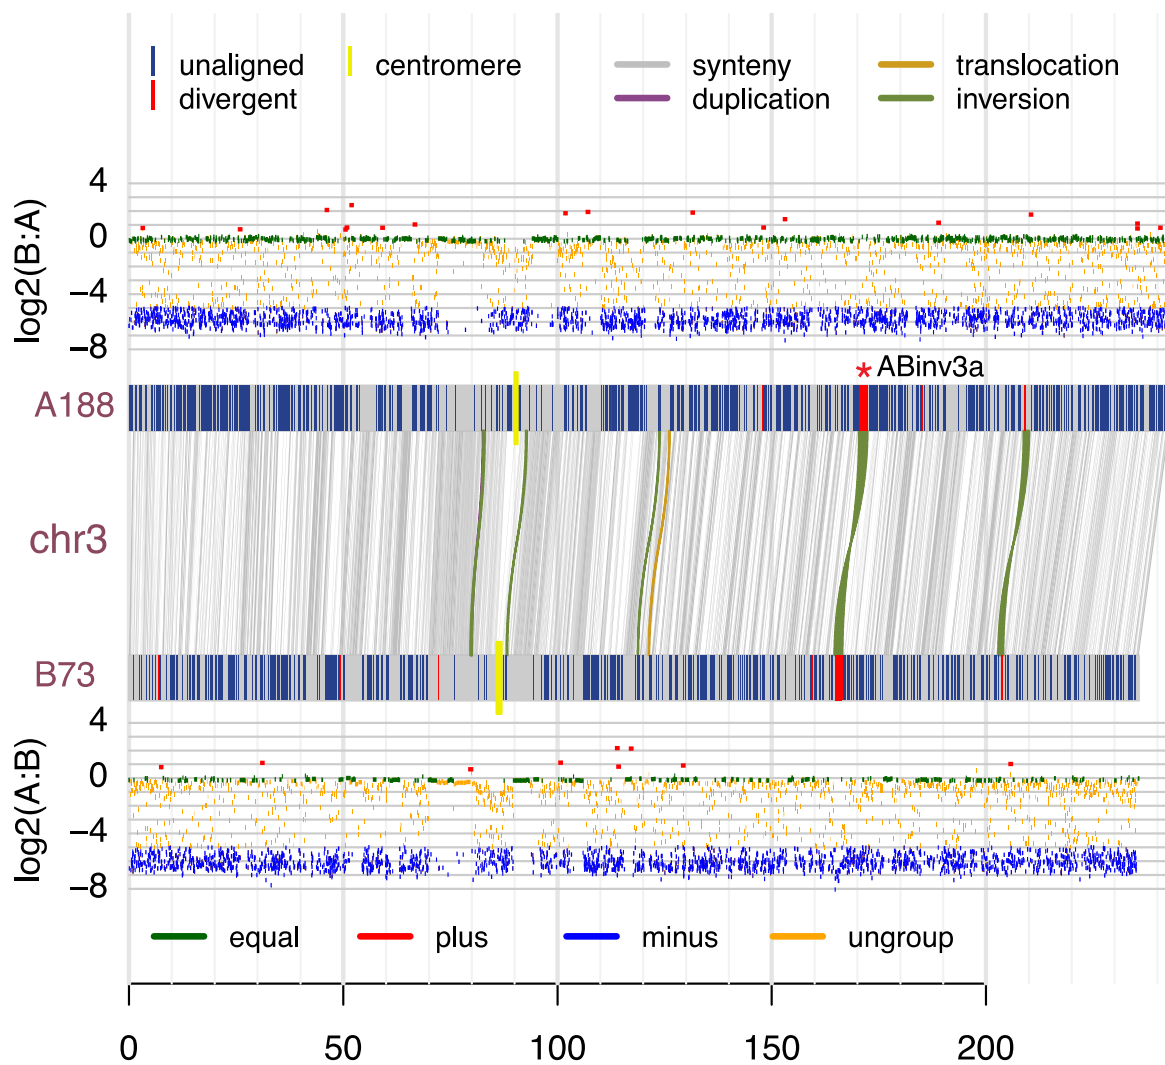

**Figure S11. SyRI and CGRD results on chromosome 3.** The red \* labels a well-evidenced inversion.

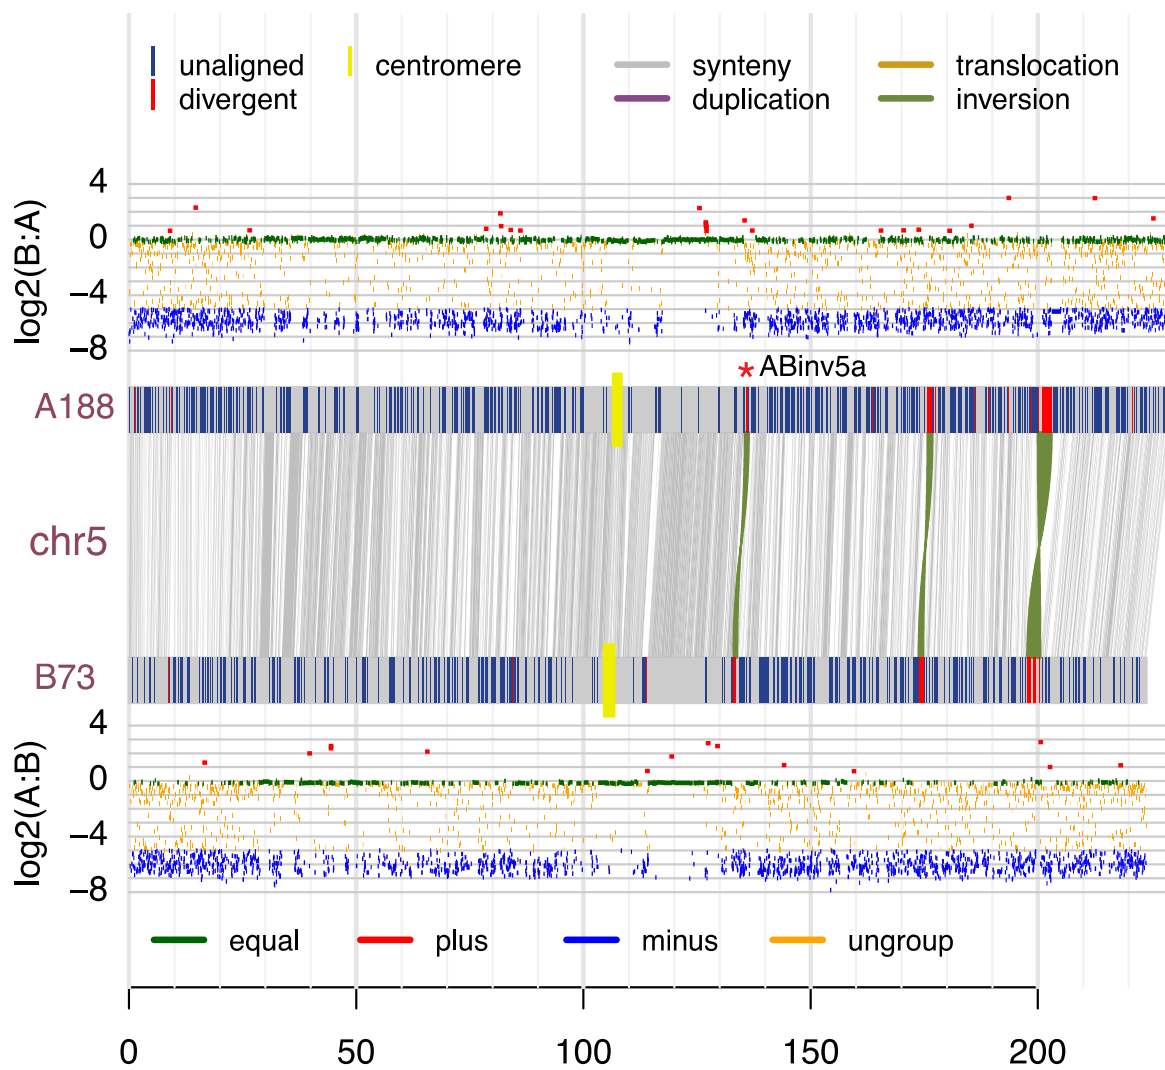

**Figure S12. SyRI and CGRD results on chromosome 5.** The red \* labels a well-evidenced inversion.

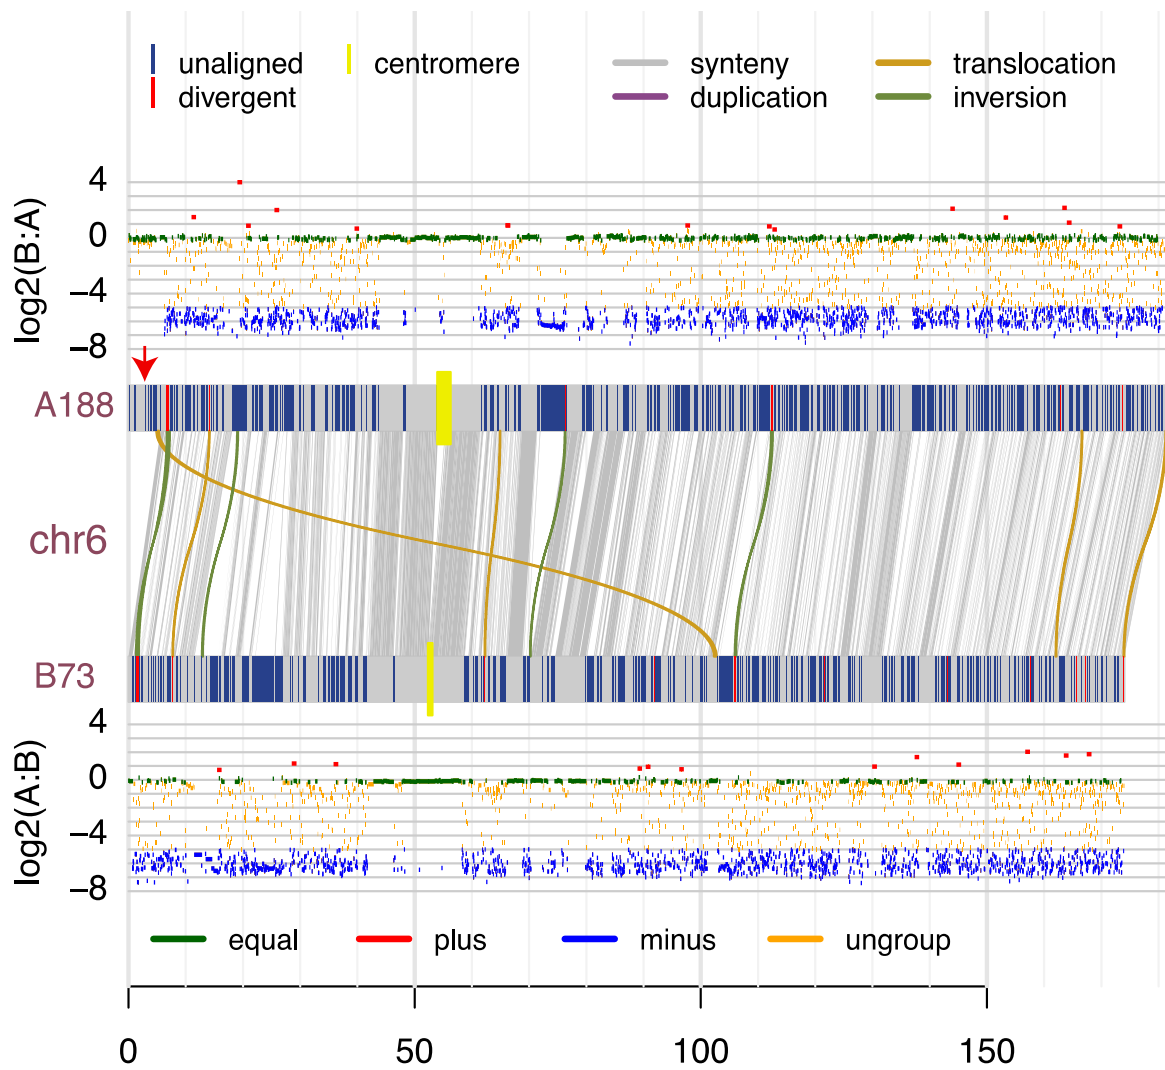

**Figure S13. SyRI and CGRD results on chromosome 6.** The arrow points at a relative conserved region (equal) between the two genomes. However, the region is missed in the B73Ref4. The newly assembled B73Ref5 has the region at the beginning of chromosome 6.

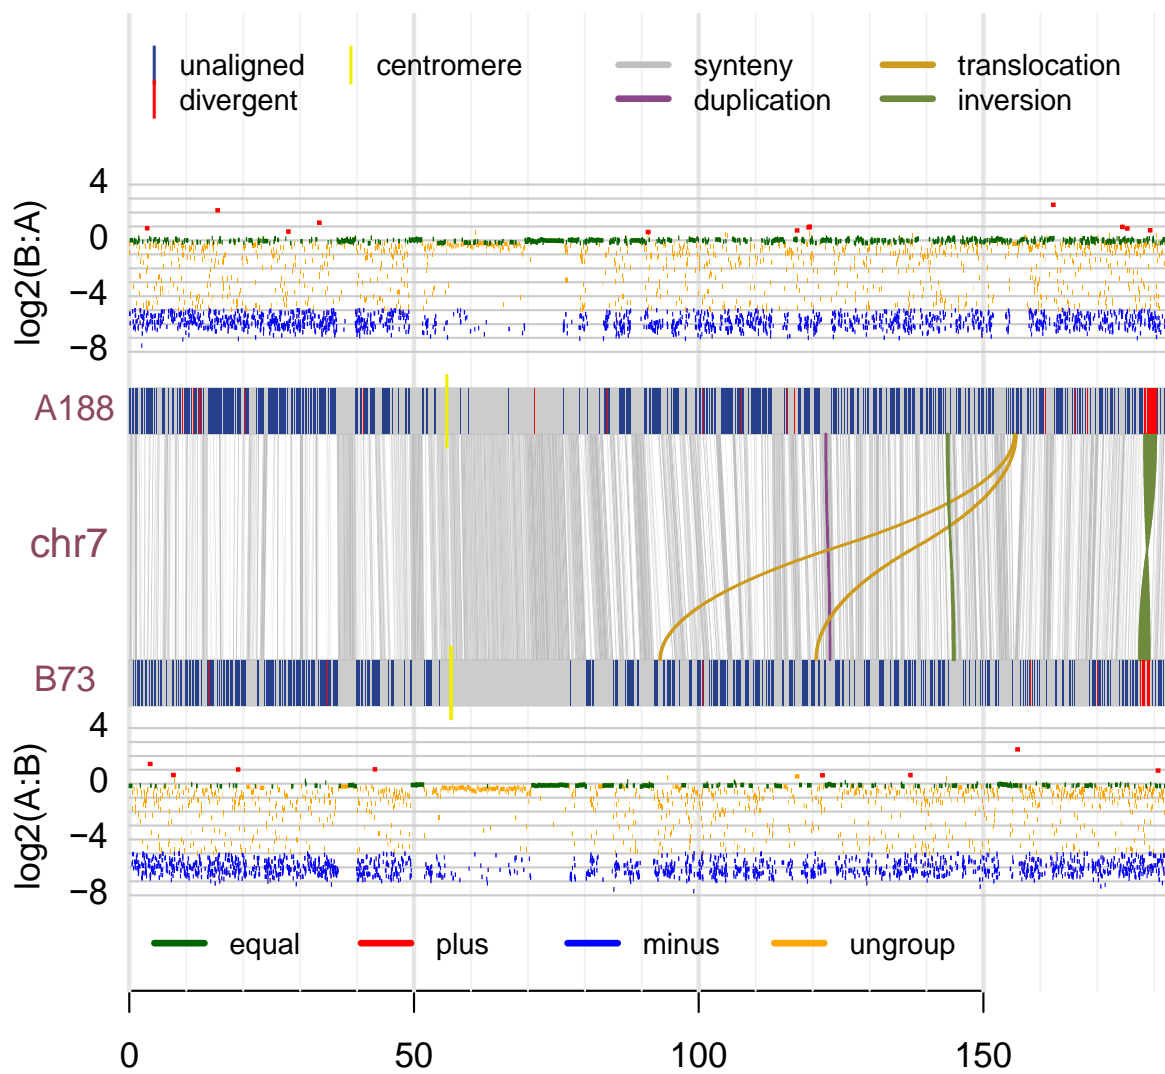

**Figure S14. SyRI and CGRD results on chromosome 7.**

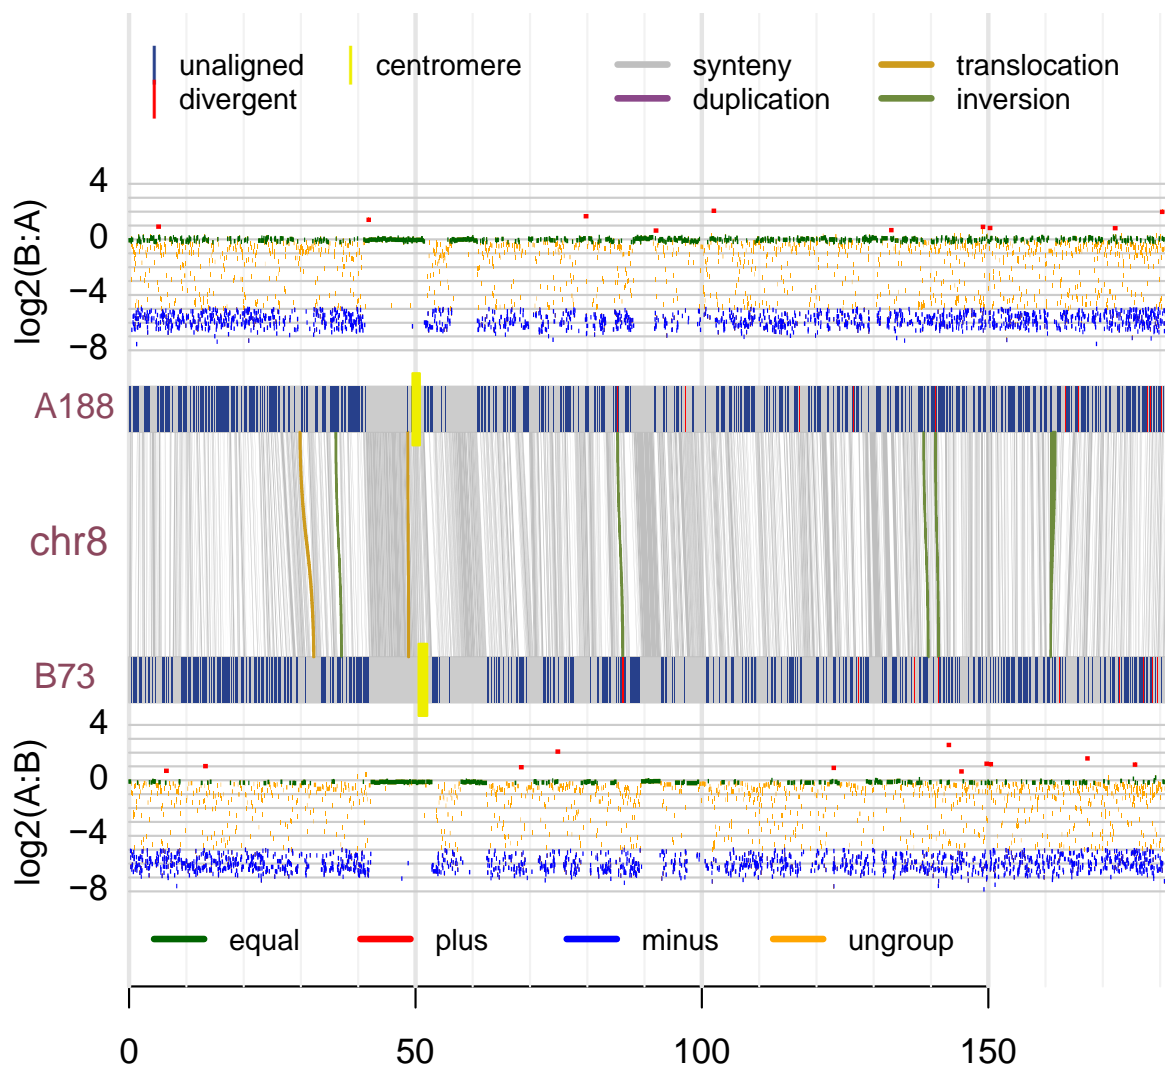

**Figure S15. SyRI and CGRD results on chromosome 8.**

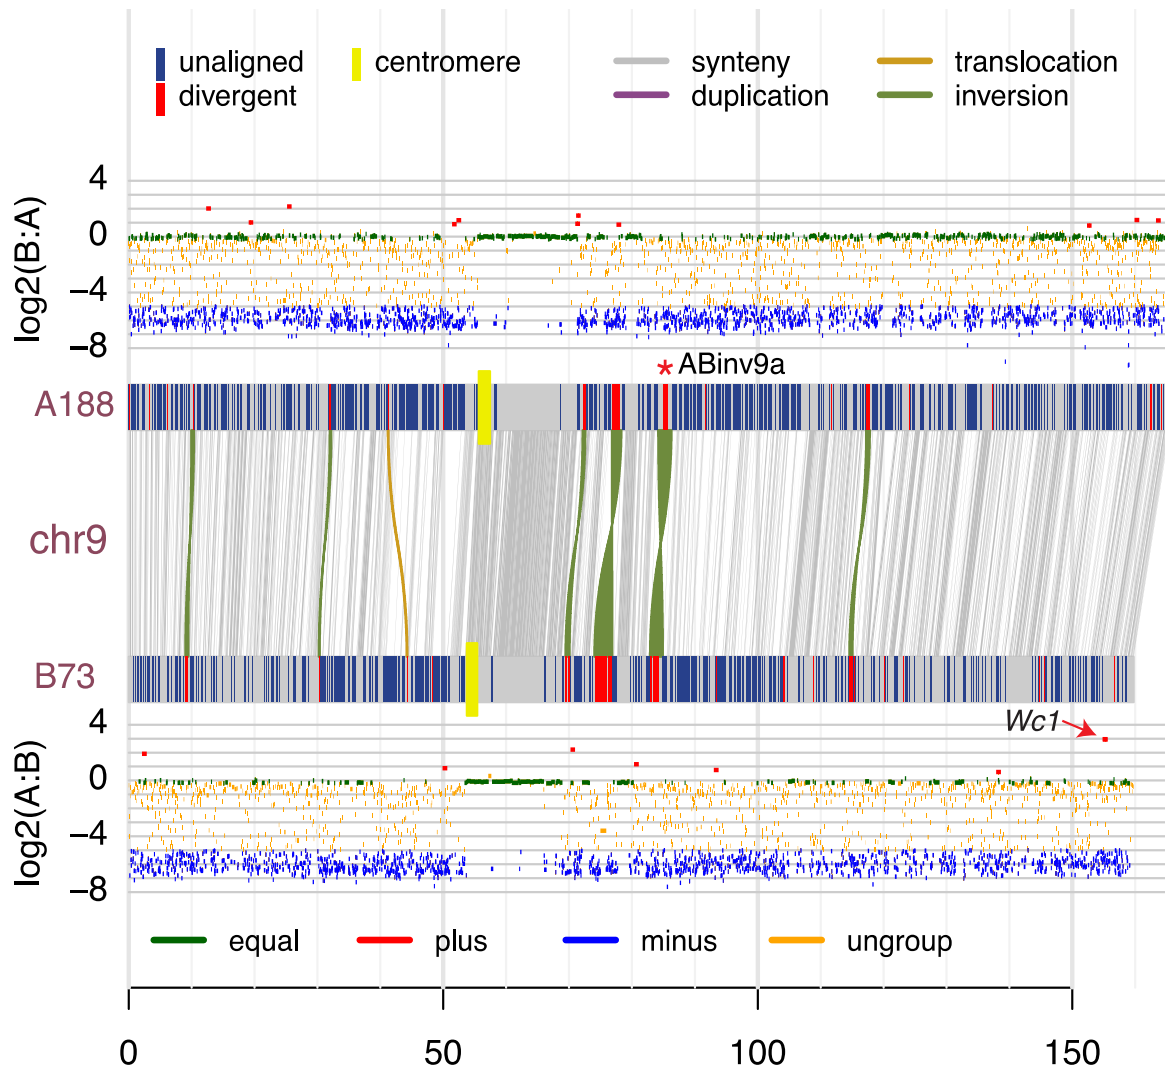

**Figure S16. SyRI and CGRD results on chromosome 9.** The red \* labels a well-evidenced inversion. The arrow points at the B73 *Wc1* region showing A188plus, which A188 has higher copy number as compared to B73.

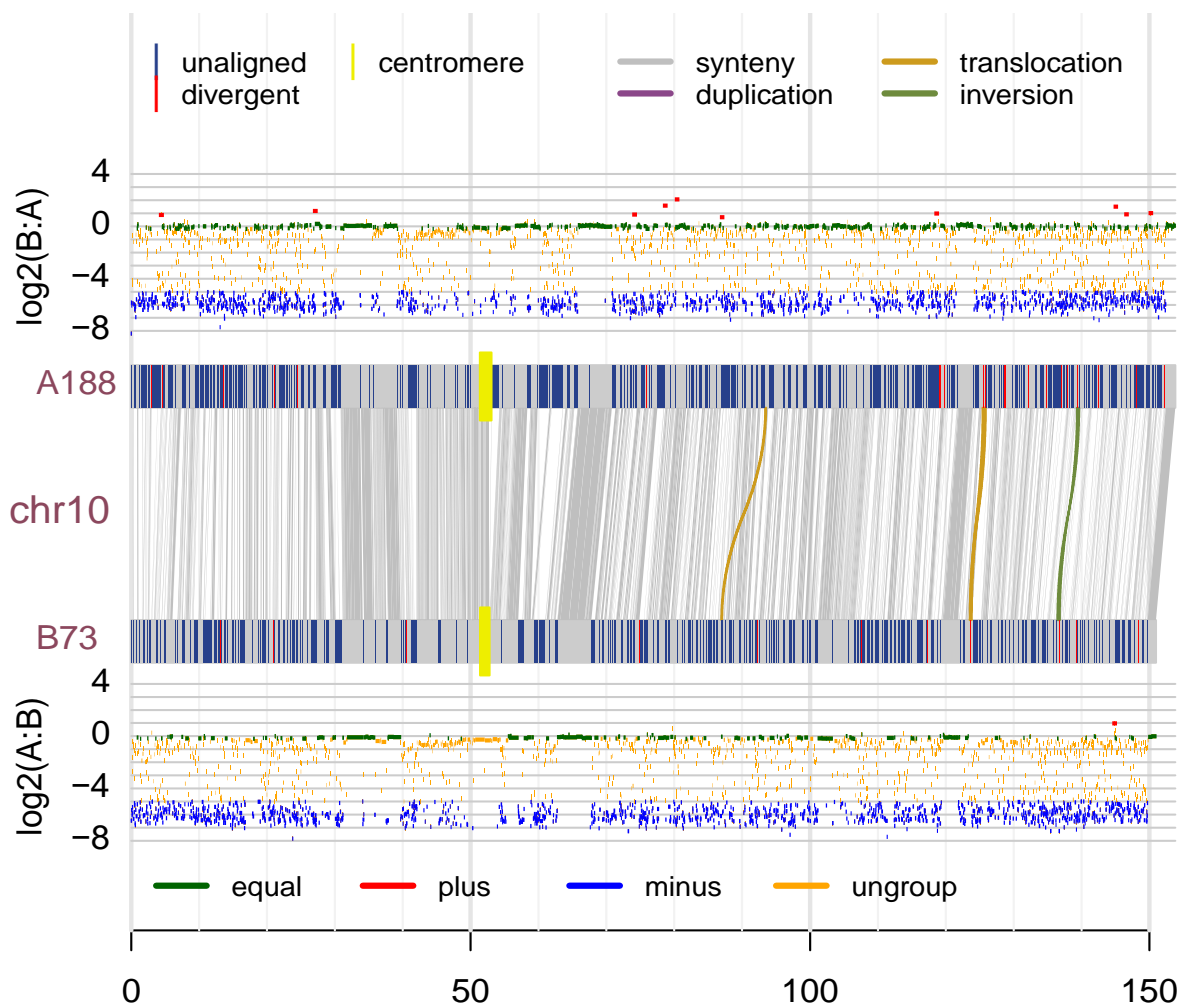

**Figure S17. SyRI and CGRD results on chromosome 10.**

**A188**

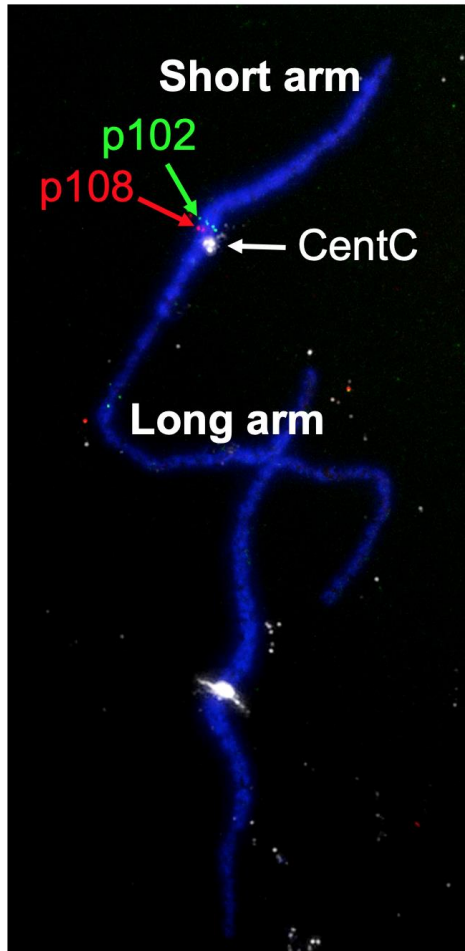

**B73**

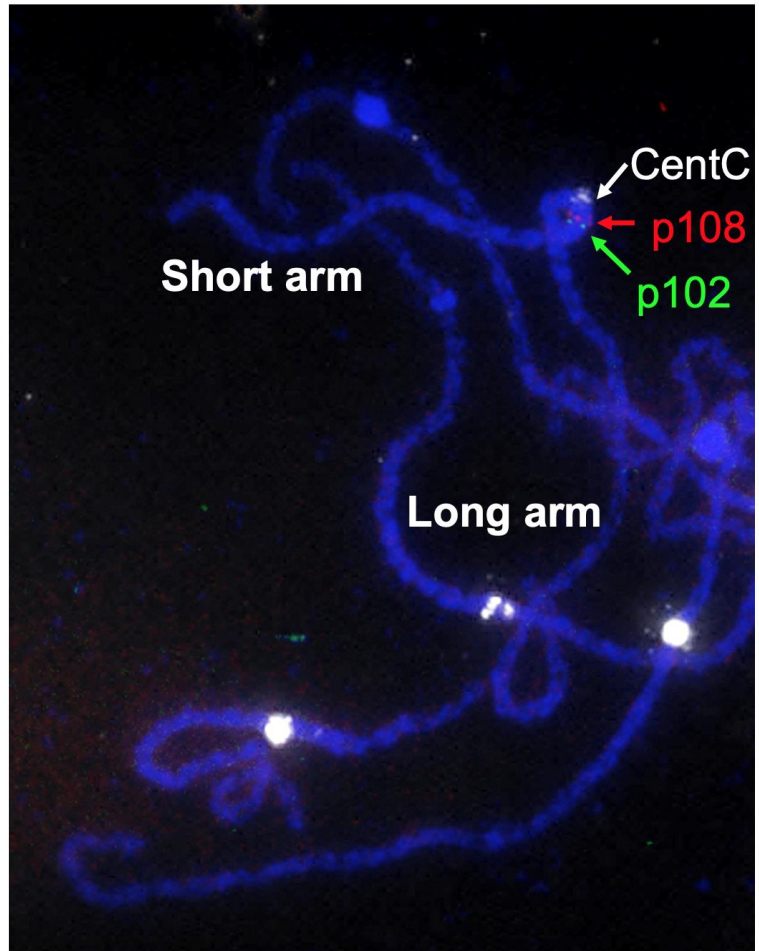

**Figure S18. FISH on an inversion candidate.** Two probes (p102 and p108) were designed on the potential inversion and labeled with green and red fluorescent colors. The CentC probe was used to locate the centromere. The result indicated that both A188 and B73 had the same order of p102 and p108, which did not support the inversion.

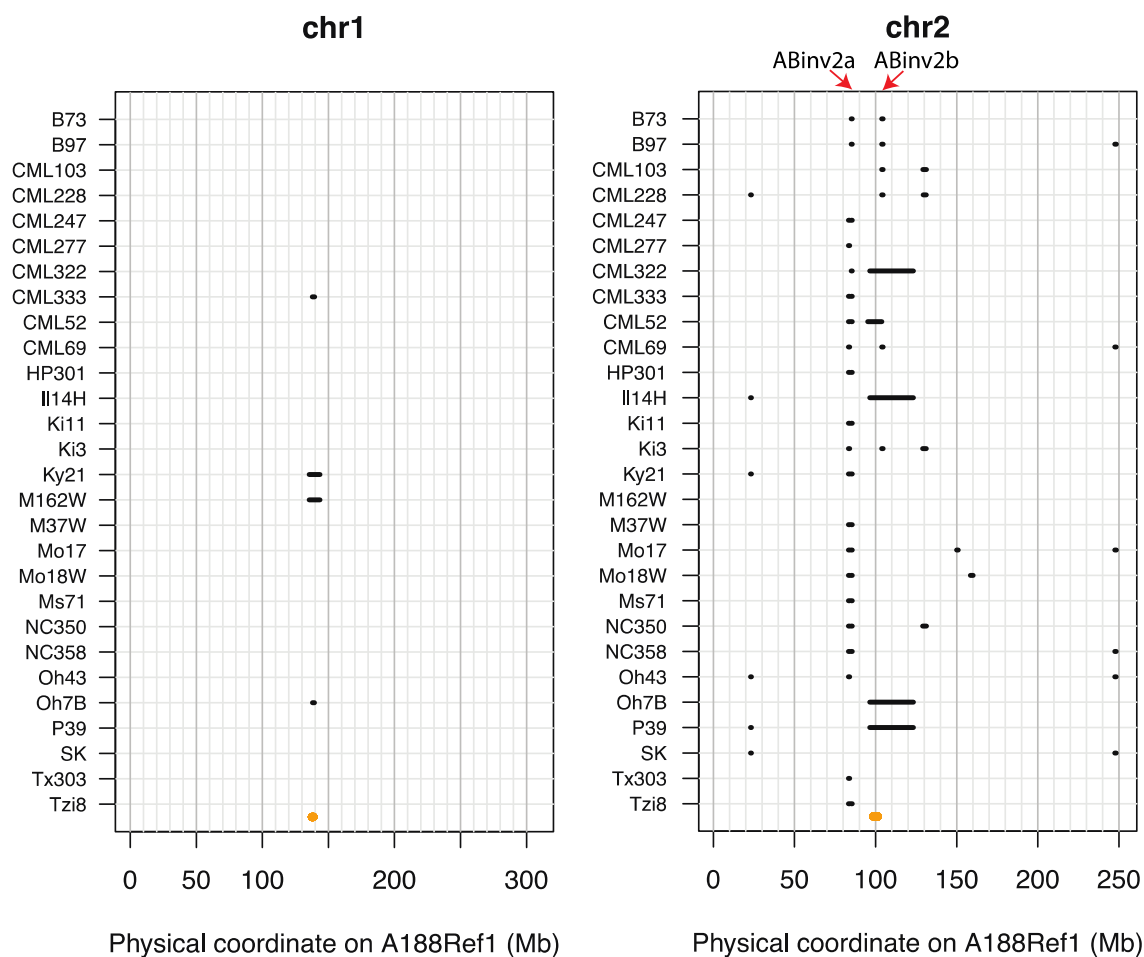

**Figure S19. Large inversions on chromosomes 1 and 2.** Inversions with at least 50 kb between A188Ref1 and each of genome assemblies were plotted. B73 stands for the genome assembly of B73Ref5 and other NAM founder genome assemblies are in version 1. The Mo17 genome assembly is the version of CAU1.0 and the SK genome assembly is in version 1. Orange bars represent centromere positions. Arrows point at two well-supported inversions: ABinv2a and ABinv2b.

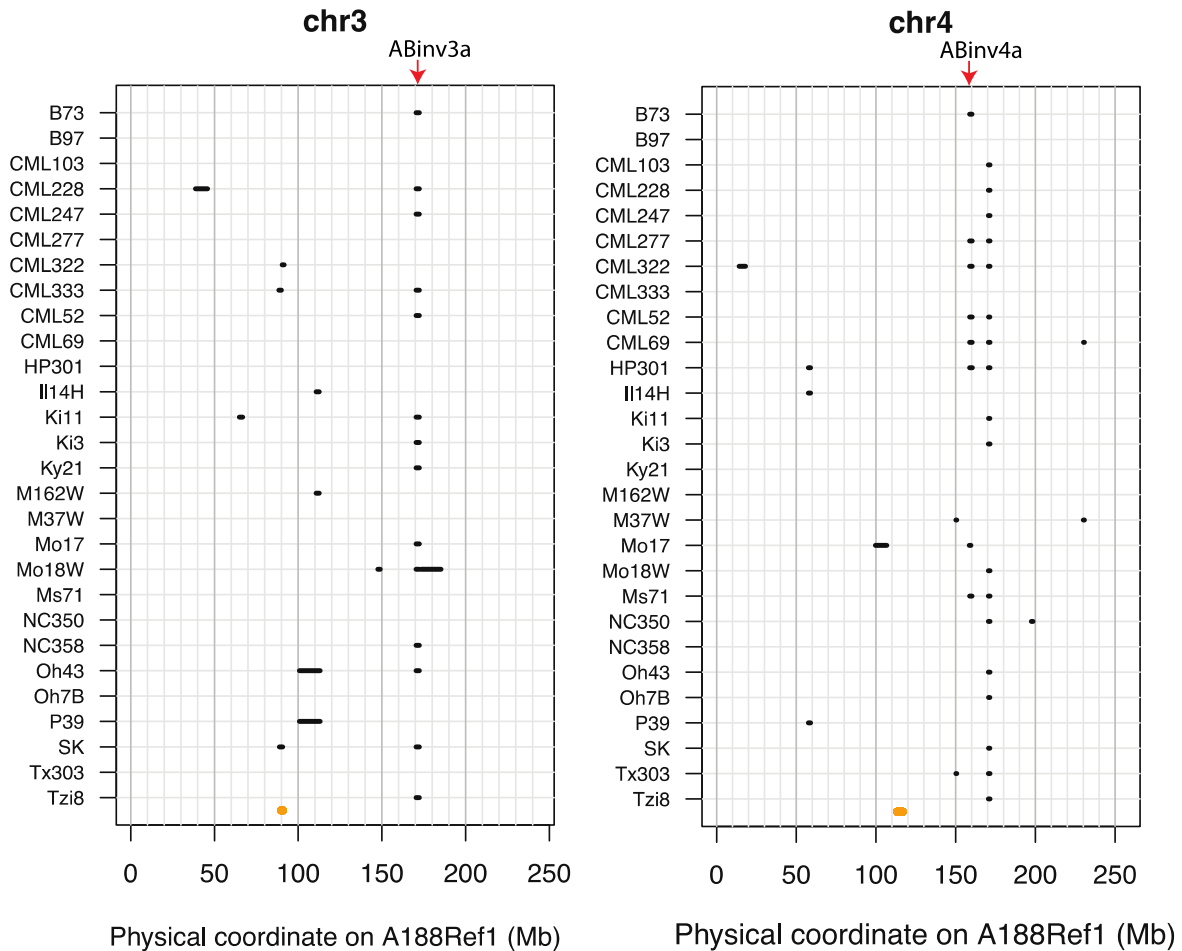

**Figure S20. Large inversions on chromosomes 3 and 4.** Inversions with at least 50 kb between A188Ref1 and each of genome assemblies were plotted. B73 stands for the genome assembly of B73Ref5 and other NAM founder genome assemblies are in version 1. The Mo17 genome assembly is the version of CAU1.0 and the SK genome assembly is in version 1. Orange bars represent centromere positions. Arrows point at two well-supported inversions: ABinv3a and ABinv4a.

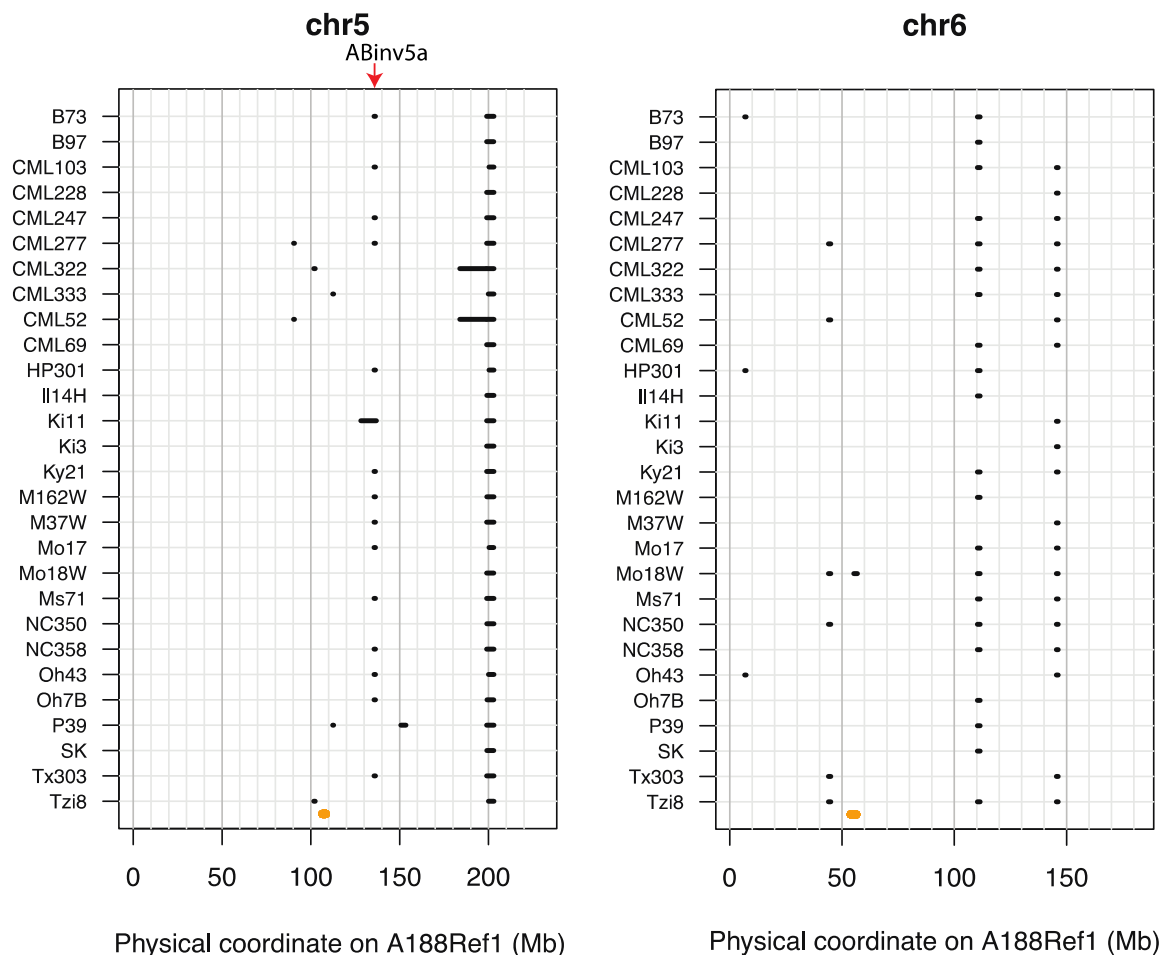

**Figure S21. Large inversions on chromosomes 5 and 6.** Inversions with at least 50 kb between A188Ref1 and each of genome assemblies were plotted. B73 stands for the genome assembly of B73Ref5 and other NAM founder genome assemblies are in version 1. The Mo17 genome assembly is the version of CAU1.0 and the SK genome assembly is in version 1. Orange bars represent centromere positions. The arrow points at a well-supported inversion: ABinv5a.

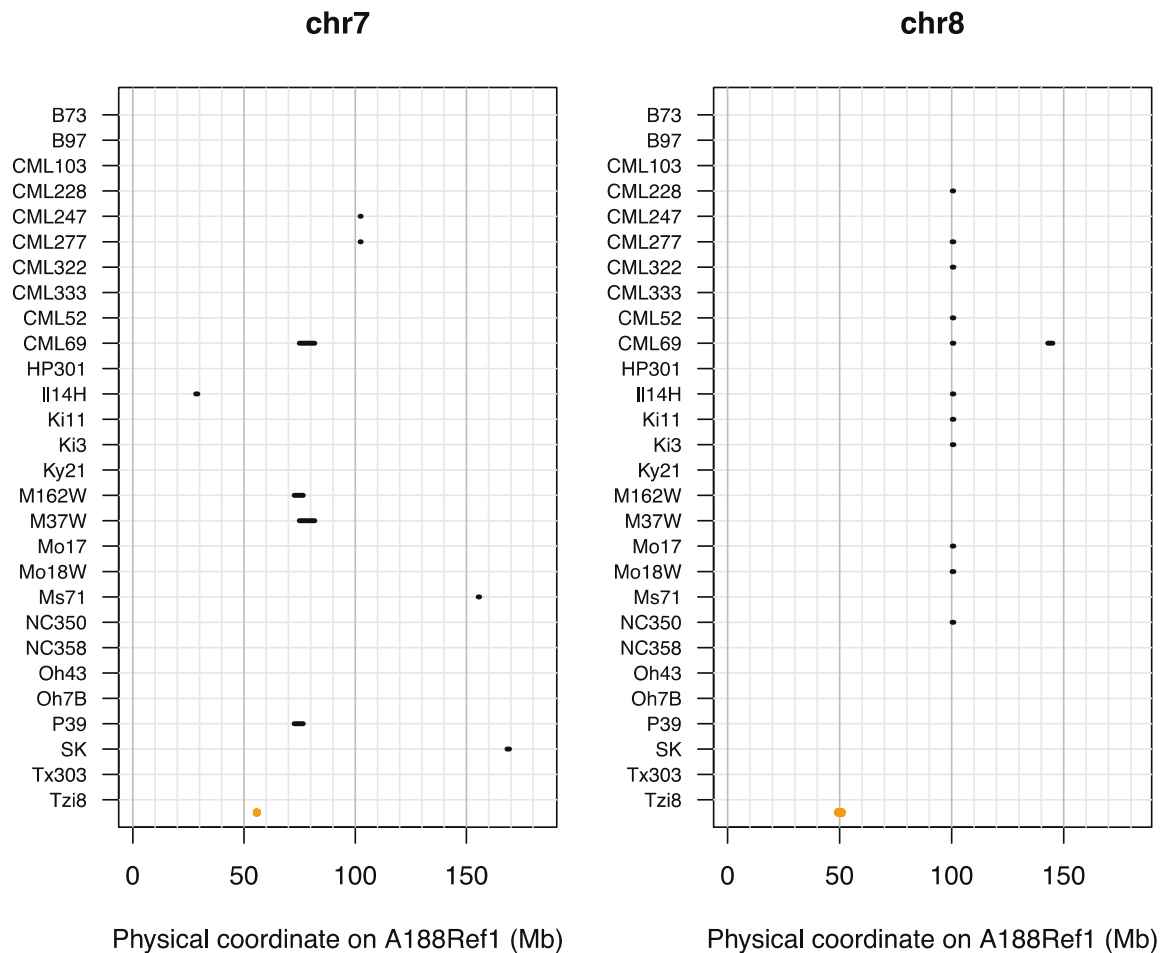

**Figure S22. Large inversions on chromosomes 7 and 8.** Inversions with at least 50 kb between A188Ref1 and each of genome assemblies were plotted. B73 stands for the genome assembly of B73Ref5 and other NAM founder genome assemblies are in version 1. The Mo17 genome assembly is the version of CAU1.0 and the SK genome assembly is in version 1. Orange bars represent centromere positions.

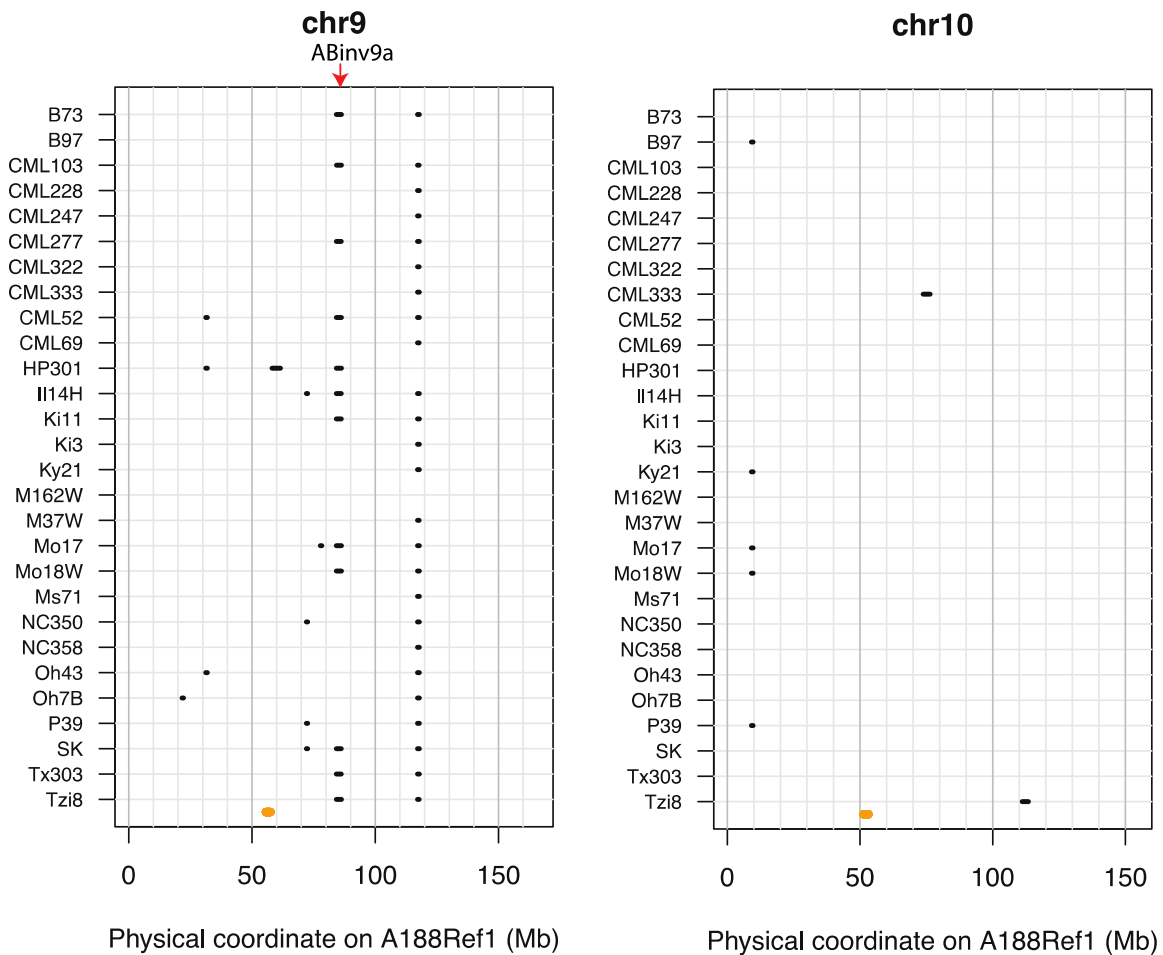

**Figure S23. Large inversions on chromosomes 9 and 10.** Inversions with at least 50 kb between A188Ref1 and each of genome assemblies were plotted. B73 stands for the genome assembly of B73Ref5 and other NAM founder genome assemblies are in version 1. The Mo17 genome assembly is the version of CAU1.0 and the SK genome assembly is in version 1. Orange bars represent centromere positions. The arrow points at a well-supported inversion: ABinv9a.



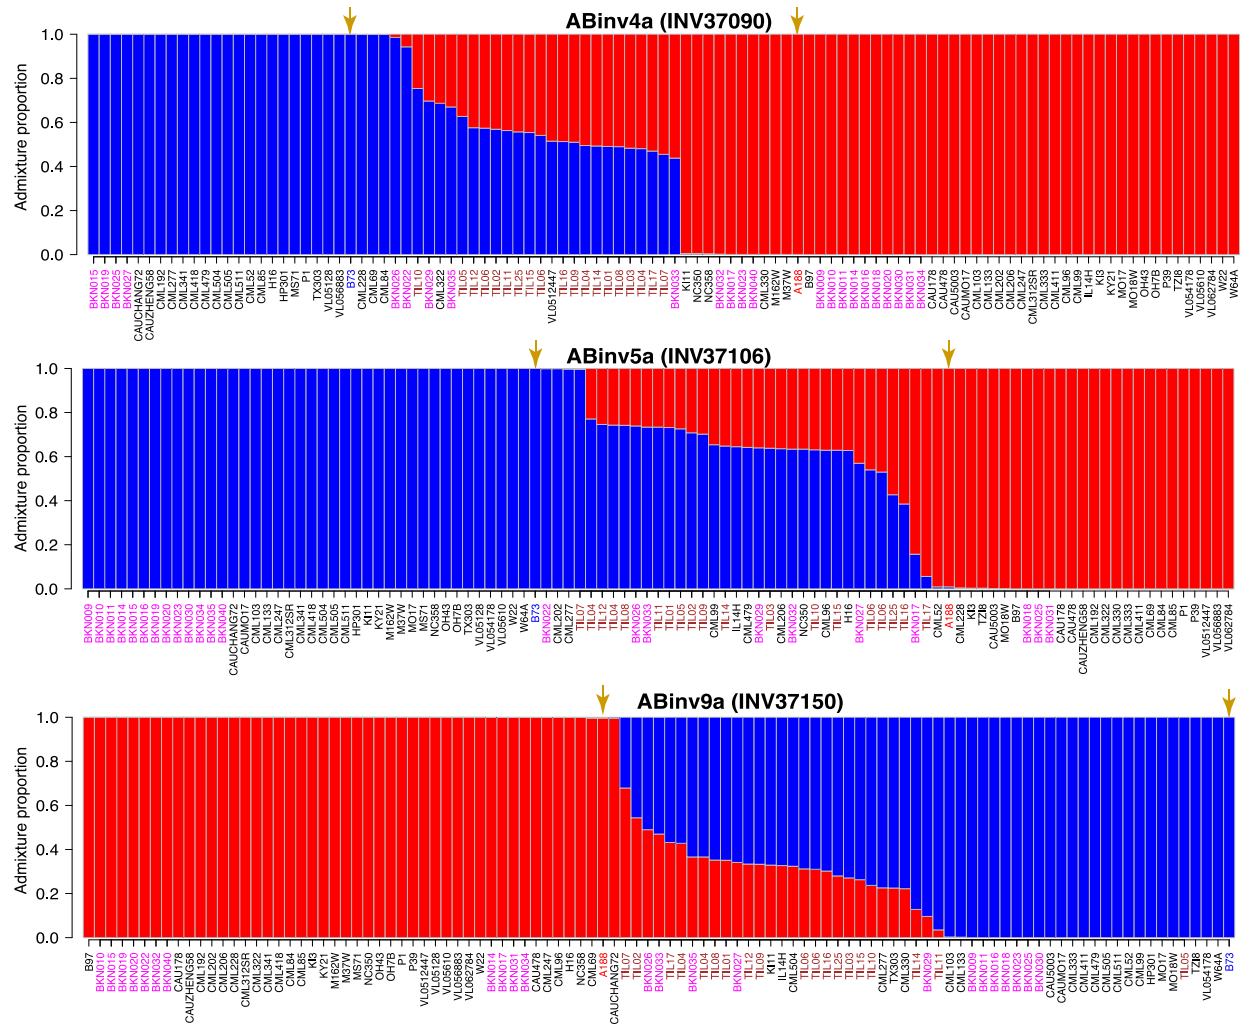

**Figure S25. Structure analysis of other three inversions in the maize Hapmap2 population - II.** The x-axis represents the maize or teosinte lines. The y-axis represents the admixture proportion of two sub-populations for each line. Arrows point at A188 and B73. The maize wild ancestors, teosinte lines, are highlighted in brown, and landrace lines are highlighted in magenta.

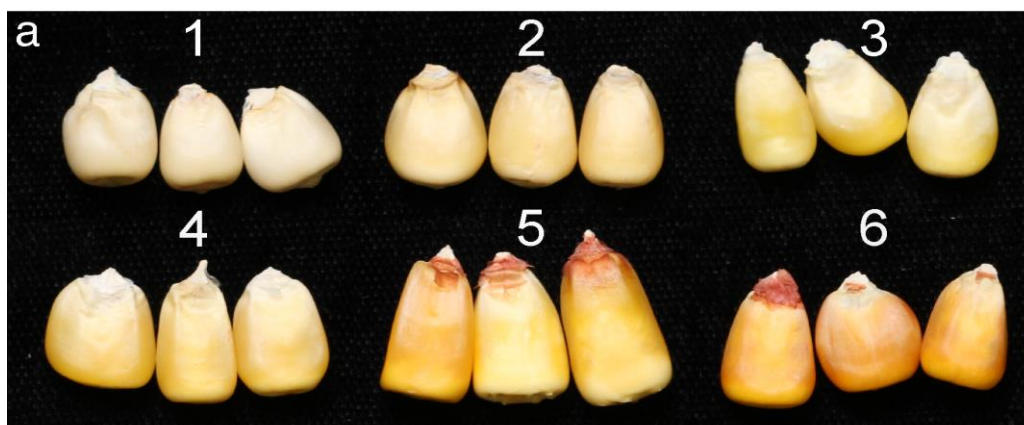

**b**

| Genotype combination of DHs |          |          | DH count of color codes from 1-6 |   |    |   |    |   |
|-----------------------------|----------|----------|----------------------------------|---|----|---|----|---|
| QTL_chr2                    | QTL_chr6 | QTL_chr9 | 1                                | 2 | 3  | 4 | 5  | 6 |
| A                           | A        | A        | 13                               | 1 | 0  | 0 | 0  | 0 |
| B                           | A        | A        | 7                                | 6 | 5  | 0 | 0  | 0 |
| A                           | A        | B        | 3                                | 0 | 4  | 0 | 0  | 0 |
| B                           | A        | B        | 5                                | 1 | 5  | 0 | 1  | 1 |
| A                           | B        | A        | 5                                | 4 | 4  | 0 | 1  | 0 |
| B                           | B        | A        | 0                                | 3 | 11 | 6 | 2  | 1 |
| A                           | B        | B        | 0                                | 0 | 1  | 0 | 4  | 0 |
| B                           | B        | B        | 0                                | 2 | 1  | 1 | 13 | 8 |

**Figure S26. Phenotypic and genotypic data of DH lines.** a) A standard of kernel colors coded from 1-6. b) Counts of DH lines with kernel colors matching to standard codes for each genotype combination of three kernel color QTLs.

|      |     |                                                                       |     |
|------|-----|-----------------------------------------------------------------------|-----|
| A188 | 1   | MAIILVRAASPGLSAADSISHQGTLCSTLLKTKRPAARRWMPCSLLGLHPWEAGRPSPA           | 60  |
| B73  | 1   | MAIILVRAASPGLSAADSISHQGTLCSTLLKTKRPAARRWMPCSLLGLHPWEAGRPSPA           | 60  |
| A188 | 61  | VYSSLAVNPAGEAVVSSEQKVYDVVLKQAALLKRQLRTPVLDARPQDMDMPRNLKEAYD           | 120 |
| B73  | 61  | VYSSLAVNPAGEAVVSSEQKVYDVVLKQAALLKRQLRTPVLDARPQDMDMPRNLKEAYD           | 120 |
| A188 | 121 | RCGEICEEYAKTFYLGTMTEERRRAIWAIYVWCRRTDELVDGPNANYITPTALDRWEK            | 180 |
| B73  | 121 | RCGEICEEYAKTFYLGTMTEERRRAIWAIYVWCRRTDELVDGPNANYITPTALDRWEK            | 180 |
| A188 | 181 | RLEDLFTGRPYDMLDAALSDTISRFPIDIQPFDRMIEGMRSDLRKTRYNNFDELYMYCYY          | 240 |
| B73  | 181 | RLEDLFTGRPYDMLDAALSDTISRFPIDIQPFDRMIEGMRSDLRKTRYNNFDELYMYCYY          | 240 |
| A188 | 241 | VAGTVGLMSVPVMGIA <b>S</b> ESKATTESVYSAALALGIANQLTNILRDVGEDARRGRIYLPQD | 300 |
| B73  | 241 | VAGTVGLMSVPVMGIA <b>T</b> ESKATTESVYSAALALGIANQLTNILRDVGEDARRGRIYLPQD | 300 |
| A188 | 301 | ELAQAGLSDEDIFKGVVTNRWRNFMKRQIKRARMFFEEAERGVTELSQASRWPVWASLLL          | 360 |
| B73  | 301 | ELAQAGLSDEDIFKGVVTNRWRNFMKRQIKRARMFFEEAERGVTELSQASRWPVWASLLL          | 360 |
| A188 | 361 | YRQILDEIEANDYNNFTKRAYVGKGKLLALPVAYGKSLLLPCSLRNGQT                     | 410 |
| B73  | 361 | YRQILDEIEANDYNNFTKRAYVGKGKLLALPVAYGKSLLLPCSLRNGQT                     | 410 |

**Figure S27. Alignment between Y1 protein sequences of A188 and B73.** Protein sequences of the transcript Zm00056a032392\_T003 (A188) and the transcript Zm00001d036345\_T001 (B73) were compared. Of 410 amino acids, 409 were identical. The polymorphic site is highlighted in red.

|        |                                                     |        |                                                     |
|--------|-----------------------------------------------------|--------|-----------------------------------------------------|
| A188y1 | TTCCAGGTGTCACCACTCAGCGTCTCCGAACACAGGAGAGTCATGCGAT   | A188y1 | AATCGCTACTGCTCCCATGTTTCATTGAGAAATGGCCAGACCTAGCCACCA |
| B73y1  | TTCCAGGTGTCACCACTCAGCGTCTCCGAACACAGGAGAGTCATGCGAT   | B73y1  | AATCGCTACTGCTCCCATGTTTCATTGAGAAATGGCCAGACCTAGCCACCA |
| A188y1 | GCGAGCTTGGCGATAAGCTTATCTATCCGCACCGCGTCTTCTTCTCTCT   | A188y1 | GAGAAGCTGCAATGCAAGGTTTCAGGTTAGGCTAGATAGAAAGTTAAATGG |
| B73y1  | GCGAGCTTGGCGATAAGCTTATCTATCCGCACCGCGTCTTCTTCTCTCT   | B73y1  | GAGAAGCTGCAATGCAAGGTTTCAGGTTAGGCTAGATAGAAAGTTAAATGG |
| A188y1 | GGGCGACCGGCCCTTCTTCTCTCCAGTCTCTCCCCCTTCTTCTCTCCAG   | A188y1 | GGCAACATCAGGAGGCCTTGATGAAAAACAGACAACCTGGTGAATTGTTG  |
| B73y1  | GGGCGACCGGCCCTTCTTCTCTCCAGTCTCTCCCCCTTCTTCTCTCCAG   | B73y1  | GGCAACATCAGGAGGCCTTGATGAAAAACAGACAACCTGGTGAATTGTTG  |
| A188y1 | AGCGAGCGTACGTATGCTACACACAGCAACAGCACAACAGTACTAGTTCC  | A188y1 | TTGGGGTCAGGCACAGAACAGATAAGAGCCGCGCAGCCAACCTAGGGCTT  |
| B73y1  | ACCAGAGCGTACGTATGCTACACACAGCAACAGCACAACAGTACTAGTTCC | B73y1  | TTGGGATCAGGCACAGAACAGATAAGAGCCGCGCAGCCAACCTAGGGCAT  |
| A188y1 | ACCACAAGAAGATGCCCAATGCAAAGAAATAACCCATGCTTCTTGTGCGAC | A188y1 | GTTTCGGTT-----AGCTCT-----                           |
| B73y1  | ACCACAAGAAGATGCCCAATGCAAAGAAATAACCCATGCTTCTTGTGCGAC | B73y1  | GTTTGGTTCAATTAGTTCTAGGACTAAACTTTAGTCTTAGGACTAAACT   |
| A188y1 | GATCCAGCCGCAC-----                                  | A188y1 | -CAATCCATGTGGATTGAGT---GGGATTGTATGGGTTTGAAACCCA--   |
| B73y1  | GATCCAGCCGCCTAGAGATGGCCAAACGGGCCGGCCCGCCCGCCCGG     | B73y1  | TTAGTCCCTATATGTTTGGTTCTAGGACTAAATAGATTTCAAAGTCATT   |
| A188y1 | -----                                               | A188y1 | -----AACAAAGTCAAACTCTT-----CTCAT-----               |
| B73y1  | CCCGGCCCGGTGAAGCCCGGCCAAACCGGCCGGGCTGTGAGCCAG       | B73y1  | AAATACATTGTCCAAAGACTCAAATACCCTTAGAATATACTCATGATATT  |
| A188y1 | -----                                               | A188y1 | -----                                               |
| B73y1  | CGGGCTTAAGTTTCTGTCACCAAGCCCGGCCGAGCGGCCATAACAGCGC   | B73y1  | AGTTATCTATAAAAAGGTAAGGGCAACATGATAATTATGAGCTTTTAGTC  |
| A188y1 | -----                                               | A188y1 | TTTTTT-----CCAATCCCATCCAATCCAT-                     |
| B73y1  | GGGCCGCGCCGTTTAGCACAAAAAACGGGCCAAAAAGCGGGCTAAACGG   | B73y1  | TCTTTTAGCACCTATGTGAAGGACTAAAGACTAAATCATTTTAGTCATA   |
| A188y1 | -----                                               | A188y1 | -----GTGTTTCGGGAA-----                              |
| B73y1  | GCCGGTAAGCACGTTTTAGTGTAATAAAAAACGGGCTTAACGGGCTTAGAG | B73y1  | TTTTAGTCCTAGTGTTTGGCAAAAAAGGGACTAAAAGGGACTAAAACTA   |
| A188y1 | -----                                               | A188y1 | -----TAACCGAACAGCCCTAGATGGATACGG                    |
| B73y1  | GTAAACGGGCCGTGCGCGGCTAGCCCGCGCTGCCTAGTTTCCCTGTCCAG  | B73y1  | GAGACTAATCTTAGTCCCTTAACCAAACACCCCTAGATGGATACGG      |
| A188y1 | -----                                               | A188y1 | AACATTCGCCTCTTATTCGGAGCAATATATGTCTCTCAAGGAAAGAGCCC  |
| B73y1  | CCCGCCCGCTTATTCTACCGTGCCGGGCTCGGACCGGCCAAAAAGCGG    | B73y1  | AACATTCGCCTCTTATTCGGAGCAATATATGTCTCTCAAGGAAAGAGCCC  |
| A188y1 | -----                                               | A188y1 | AACATGTATACTGCCTCTTTTCTCATCCCAGATTTGGGGGAAAAACAA    |
| B73y1  | GCTTCGTGCCGGGCTCACGGGCTCGTGCTTTTGGCCATCTATGAGCCG    | B73y1  | AACATGTATACTGCCTCTTTTCTCATCCCAGATTTGGGGGAAAAACAA    |
| A188y1 | ---ACTTAGCATACGTACGCAAGAAGAGGAGAGCGCGAGGTGCGCGTGC   | A188y1 | TGTAAATGCCAATGGTATCGTAGGAAGATTACTAGAAGTAAATGCCAATG  |
| B73y1  | CACACTTAGCATACGTACGCAAGAAGAGGAGAGCGCGAGGTGCGCGTGC   | B73y1  | TGTAAATGCCAATGGTATCGTAGGAAGATTACTAGAAGTAAATGCCAATG  |
| A188y1 | TCCTTGCTGTTCTGCTGACTGGTCTCATCATCTCATCCACCAACCACCAT  | A188y1 | TAAAAACAGATGAGTTGGCATTACATGATAGGATGGTGGGATCATCAGA   |
| B73y1  | TCCTTGCTGTTCTGCTGACTGGTCTCACCATCTCATCCACCAACCACCAT  | B73y1  | TAAAAACAGATGAGTTGGCATTACATGATAGGATGGTGGGATCATCAGA   |
| A188y1 | CACCA-----TCTCTAGGATAAGATAGCAAATATATGGCCATCATACTC   | A188y1 | CTGAAAATGATAGGGGATTGTGCTCCCTGCGACTCCAACACTATAAACAA  |
| B73y1  | CACCAACCACCATCTTTAGGATAAGATAGCAAATATATGGCCATCATACTC | B73y1  | CTGAAAATGATAGGGGATTGTGCTCCCTGCGACTCCAACACTATAAACAA  |
|        | [ ... ]                                             |        |                                                     |

**Figure S28. Alignment of 5' and 3' flanking sequences of A188 y1 and B73 Y1 alleles.** Translation start sites and translation termination sites are highlighted in yellow. A (CCA)<sub>n</sub> microsatellite variation at the 5' untranslated region is highlighted in green. Most gene body sequences are skipped.

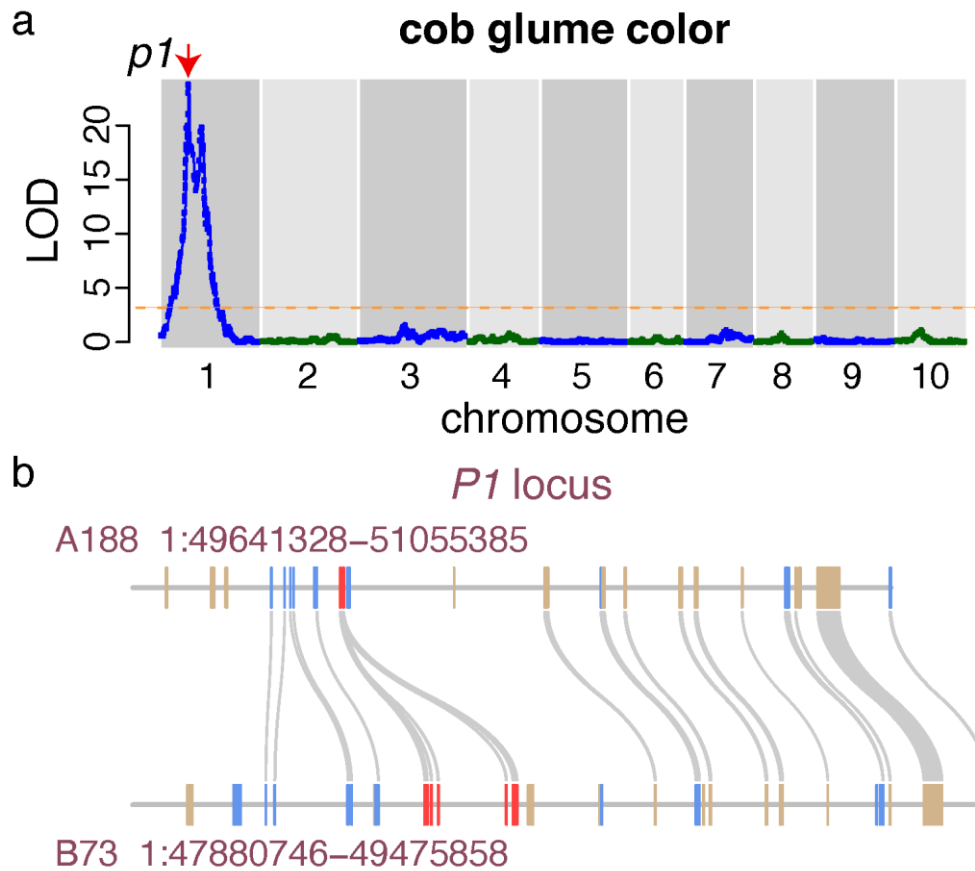

**Figure S29. Genetic analysis of cob color.** **a)** Plot of LODs from QTL analysis versus genetic positions of markers along ten chromosomes. The orange horizontal line indicates the LOD threshold from 1,000 permutation test. The arrow points at the genetic location of the *P1* gene. **b).** Each rectangle box represents a gene with blue, tan, and red colors indicating plus, minus orientation, and *P1* homologous genes.

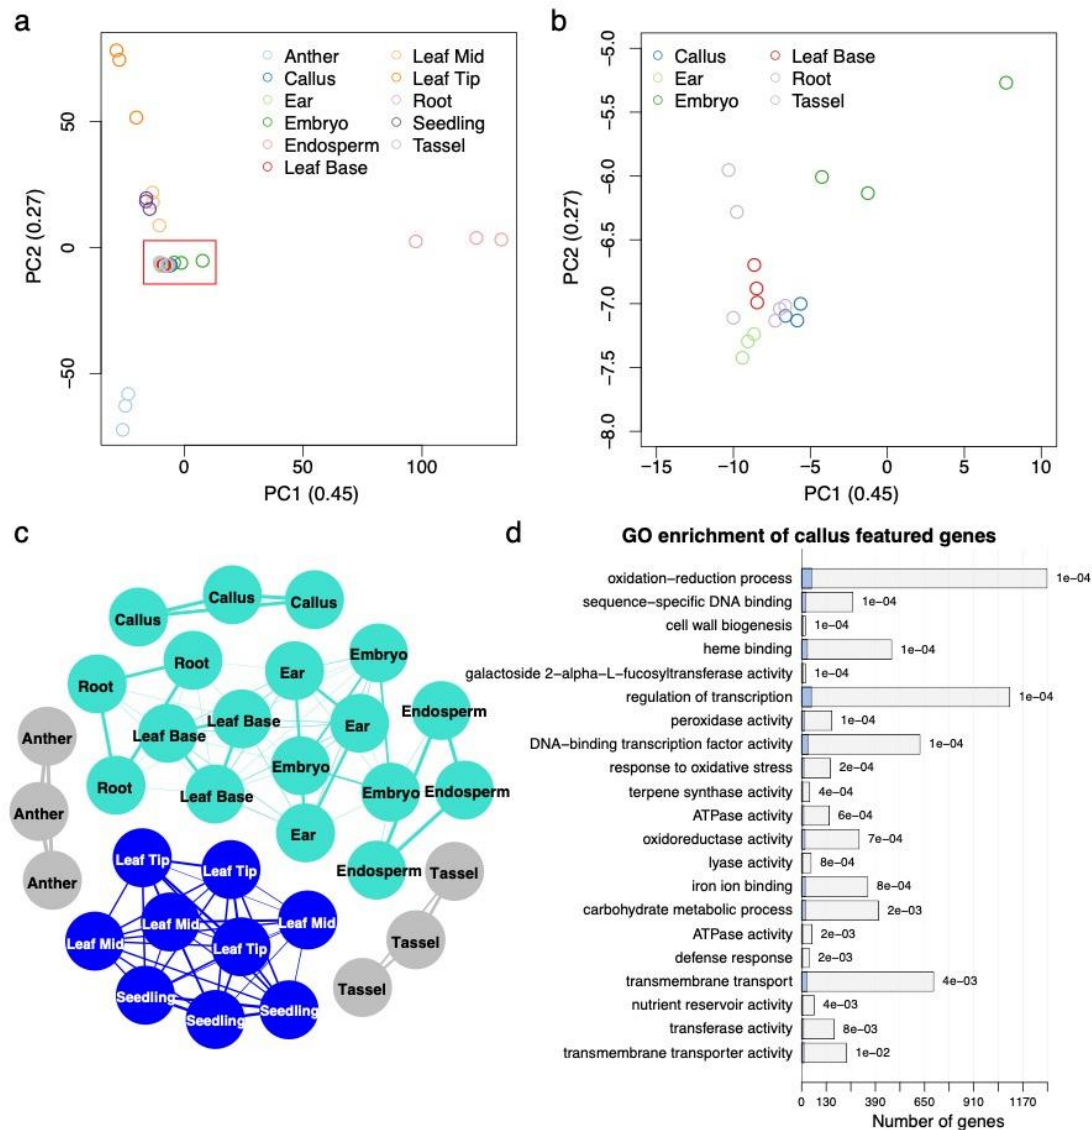

**Figure S30. sample clustering and callus-featured genes** **a)** Principal component analysis (PCA) results of gene expressions in 11 A188 tissues. The x-axis and y-axis represent the first component (PC1) and the second component (PC2), respectively. The numbers within the parentheses stand for the proportions of the variation of gene expressions explained by either PC1 or PC2. **b)** Enlarged PCA plot of the red box in **a**. **c)** The network of 33 RNA-Seq samples from 11 tissue types constructed based on their gene expression. Two major clusters were identified. One cluster (turquoise) includes callus, root, leaf base, ear, embryo, and endosperm; the other cluster (blue) includes leaf tip, leaf middle, and seedling. The leaf base, middle, and tip are three parts from base to tip from the same leaf. **d)** GO enrichment of callus featured genes. In each barplot, a blue bar stands for the number callus featured genes and the whole bar (blue and empty) stands for the total number of genes of the associated GO term. P-values are labeled on the top of each bar. Only the GO terms with the p-value smaller than 0.01 and containing at least five callus featured genes were plotted.

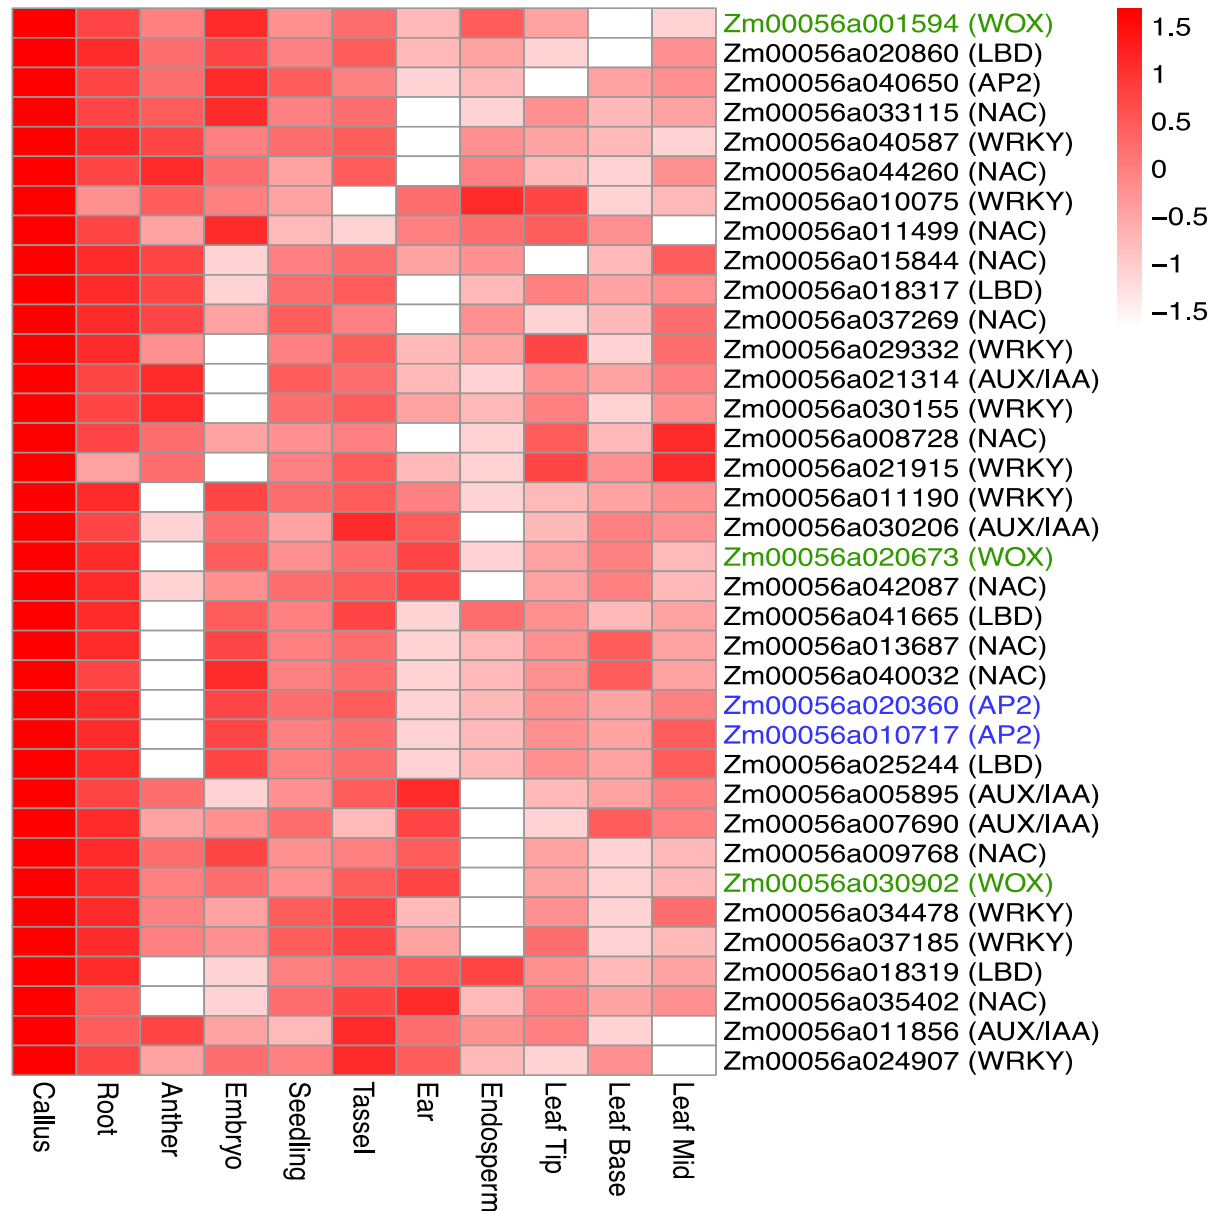

**Figure S31. Heatmap plots of expression of callus-featured TF genes.** The row and column represent the callus-featured TFs and tissues, respectively. The values of gene-wise quantile-quantile normalized (qqnorm) gene expressions are color-coded. The qqnorm implemented by an R package "qqnorm" that normalizes gene expressions to a Gaussian distribution. Genes homologous to *Baby boom* and *Wuschel2* are colored in blue and green, respectively.

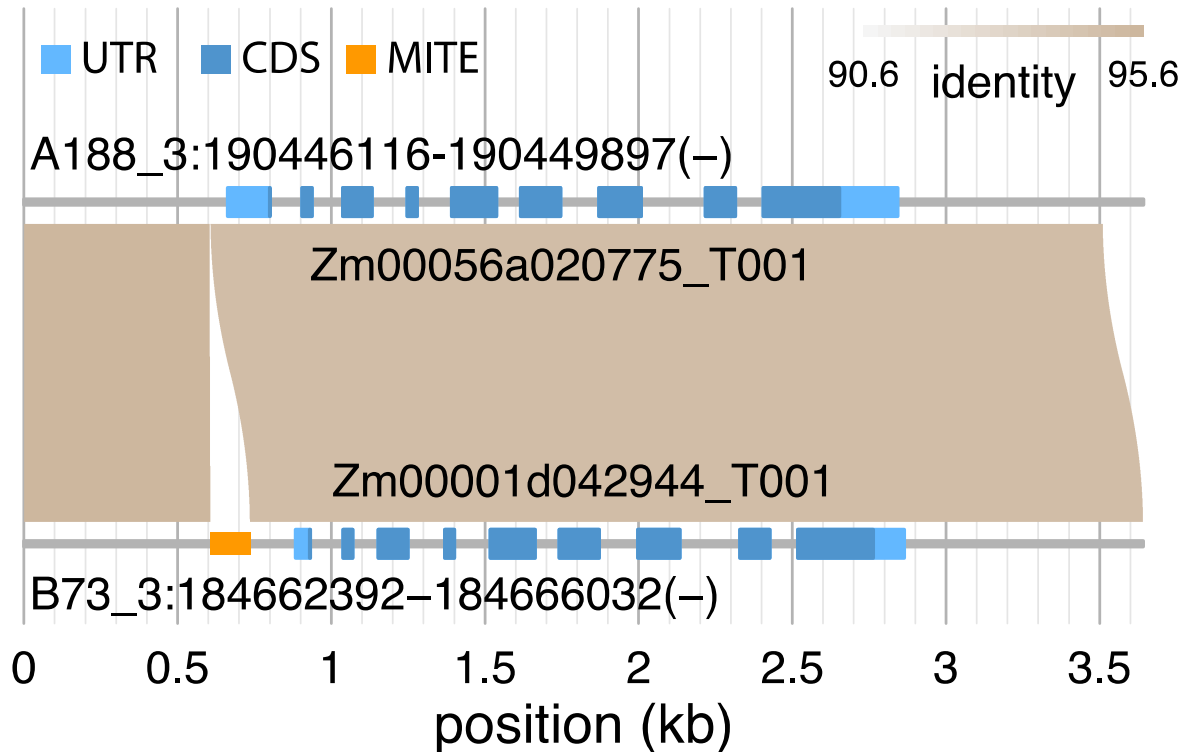

**Figure S32. Alignment between Zm00056a020775 and the B73 homolog.** Genomic sequences of the A188 gene Zm00056a020775, 800 bp before the gene start, and 800 bp after the gene end were aligned with the B73Ref4 and the aligned region includes the homologous B73 gene Zm00001d042944. A 120 bp MITE insertion (orange) was found at 141 bp upstream of the gene start in B73. The transcripts of both genes were plotted from 5' to 3' and both are in the minus orientation in the reference genomes, which are indicated by “(-)”. The identity between aligned is color-coded. UTR: untranslated region; CDS: coding sequence.
